# Supplementary material for: Species-Specific Cuticular Hydrocarbon Stability within European Myrmica Ants
Source: PubMed Central journal article supplement (PMC5119849; doi:10.1007/s10886-016-0784-x), 2016-11-10
Supplement: 10886_2016_784_MOESM1_ESM.pdf [file 10886_2016_784_MOESM1_ESM.pdf]

SPECIES-SPECIFIC CUTICULAR HYDROCARBON STABILITY WITHIN EUROPEAN *Myrmica* ANTS

RHIAN M. GUILLEM<sup>1,2,\*</sup>, FALKO P. DRIJFHOUT<sup>3</sup>, STEPHEN J. MARTIN<sup>4</sup>

<sup>1</sup>*Department of Animal and Plant Sciences, University of Sheffield, Sheffield S10 2TN, UK*

<sup>2</sup>*Department of Life & Earth Sciences, Gibraltar Botanic Gardens Campus, University of Gibraltar, Gibraltar*

<sup>3</sup>*Chemical Ecology Group, School of Physical and Geographical Sciences, Lennard-Jones Laboratory, Keele University, Keele ST5 5BG, UK*

<sup>4</sup>*School of Environment & Life Sciences, University of Salford, Manchester M5 4WT, UK*

\* Corresponding author. E-mail: rguillem@gibraltargardens.gi

**Online Resource 1** Collection sites for *Myrmica* ants. Latitude and longitude are given in decimal World Geodetic System. Numbers of colonies given are those which were chemo-typed and statistically analyzed.

| Date       | Species               | Location                        | Latitude   | Longitude  | Elevation | Country | No. colonies | Habitat                                                                                     |
|------------|-----------------------|---------------------------------|------------|------------|-----------|---------|--------------|---------------------------------------------------------------------------------------------|
| 7.10.2010  | <i>M. scabrinodis</i> | Slapton Ley                     | 50.300833N | 3.650277W  | 46m       | England | 3            | Grassy, open field.                                                                         |
| 6.10.2010  | <i>M. scabrinodis</i> | Dartmoor                        | 50.456944N | 4.060277W  | 213m      | England | 2            | Lowland Moor.                                                                               |
| 6.10.2010  | <i>M. scabrinodis</i> | Dartmoor                        | 50.4650N   | 4.0825W    | 170m      | England | 4            | Lowland Moor.                                                                               |
| 13.10.2010 | <i>M. scabrinodis</i> | Fulwood Booth                   | 53.362669N | 1.586294W  | 365m      | England | 2            | Upland moor with rocky outcrops.                                                            |
| 13.10.2010 | <i>M. scabrinodis</i> | Stoney Middleton                | 53.281111N | 1.687777W  | 244m      | England | 2            | Disused limestone quarry.                                                                   |
| 8.04.2011  | <i>M. scabrinodis</i> | Cardiff                         | 51.541486N | 3.201375W  | 103m      | Wales   | 1            | Mowed open grass field.                                                                     |
| 30.5.2011  | <i>M. scabrinodis</i> | Kenfig                          | 51.515555N | 3.741666W  | 9m        | Wales   | 4            | Coastal sand dunes.                                                                         |
| 18.8.2012  | <i>M. scabrinodis</i> | Joskär Island                   | 59.845491N | 23.254722E | 16m       | Finland | 1            | Island with open <i>Pinus sylvestris</i> woodland.                                          |
| 19.8.2012  | <i>M. scabrinodis</i> | Hanko                           | 59.842033N | 23.247300E | 10m       | Finland | 1            | Coastal grass margins next to reed bed.                                                     |
| 19.8.2012  | <i>M. scabrinodis</i> | Hanko                           | 59.843033N | 23.237333E | 18m       | Finland | 6            | Open coniferous forest with large granite outcrops. Ground moss & lichen, with boggy areas. |
| 20.8.2012  | <i>M. scabrinodis</i> | Hanko                           | 59.827700N | 23.015650E | 23m       | Finland | 1            | Coniferous forest with thick ground covering of moss and lichen.                            |
| 20.8.2012  | <i>M. scabrinodis</i> | Tvärminneön                     | 59.843286N | 23.224966E | 8m        | Finland | 3            | Agricultural field with long grass.                                                         |
| 21.8.2012  | <i>M. scabrinodis</i> | Harparskog                      | 59.933033N | 23.318883E | 17m       | Finland | 4            | Open Sphagnum bog with scattered small <i>Pinus</i> and <i>Betula</i> .                     |
| 21.8.2012  | <i>M. scabrinodis</i> | Tvärminneön                     | 59.843983N | 23.233233E | 4m        | Finland | 3            | Agricultural field with long grass                                                          |
| 21.8.2012  | <i>M. scabrinodis</i> | Porsgrundet Island              | 59.842233N | 23.252516E | 8m        | Finland | 4            | Rocky, open grassy outcrops.                                                                |
| 22.8.2012  | <i>M. scabrinodis</i> | Tvärminneön                     | 59.843286N | 23.224966E | 8m        | Finland | 2            | Agricultural field with long grass.                                                         |
| 18.6.2011  | <i>M. scabrinodis</i> | Val de Ruda                     | 42.671366N | 0.956666E  | 1595m     | Spain   | 1            | Alpine meadow with stream.                                                                  |
| 18.6.2011  | <i>M. scabrinodis</i> | Mata de Valencia                | 42.639233N | 1.028350E  | 1574m     | Spain   | 2            | <i>Abies alba</i> forest glade.                                                             |
| 18.6.2011  | <i>M. scabrinodis</i> | Centre Natura Les Planes de Son | 42.618133N | 1.082000E  | 1536m     | Spain   | 1            | Alpine meadow.                                                                              |
| 19.6.2011  | <i>M. scabrinodis</i> | 3.4km from Son                  | 42.617583N | 1.054450E  | 1902m     | Spain   | 2            | Open woodland of <i>Pinus nigra</i> alongside small glades with several streams.            |
| 20.6.2011  | <i>M. scabrinodis</i> | Val de Varradòs                 | 42.749100N | 0.761733E  | 949m      | Spain   | 2            | Flat, wet meadow next to stream, surrounded by forest of <i>Pinus sylvestris</i> .          |

| Date       | Species        | Location                        | Latitude   | Longitude  | Elevation     | Country | No. colonies | Habitat                                                                                    |
|------------|----------------|---------------------------------|------------|------------|---------------|---------|--------------|--------------------------------------------------------------------------------------------|
| 20.6.2011  | M. scabrinodis | Val de Varradòs                 | 42.776800N | 0.831966E  | 1560m         | Spain   | 1            | Flat, grazed meadow next to stream surrounded by forest of <i>Fagus sylvaticus</i> .       |
| 20.6.2011  | M. scabrinodis | Val de Ruda                     | 42.643466N | 0.822083E  | 1860m         | Spain   | 1            | Rocky meadow.                                                                              |
| 22.6.2011  | M. scabrinodis | Prats del Coro                  | 42.621777N | 1.071222E  | 1670m         | Spain   | 2            | Mosaic of meadow with bracken and <i>Juniperus communis</i> scrub.                         |
| 22.6.2011  | M. scabrinodis | Pas del Coro                    | 42.623361N | 1.061638E  | 1811m - 1850m | Spain   | 2            | Meadow with boggy and dry areas.                                                           |
| 23.6.2011  | M. scabrinodis | Pla de Beret                    | 42.731444N | 0.982777E  | 2071m         | Spain   | 1            | Short, sparse alpine meadow on ski slope with scattered rocks.                             |
| 27.6.2011  | M. scabrinodis | Ribera de Sant Martí            | 42.509138N | 0.876222E  | 1702m         | Spain   | 2            | Flat, dry meadow next to river and open <i>Pinus</i> woodland.                             |
| 27.6.2011  | M. scabrinodis | near Boi Taüll Ski Station      | 42.486055N | 0.864388E  | 1913m         | Spain   | 2            | Alpine meadow on slope next to stream, with wet and dry areas.                             |
| 27.6.2011  | M. scabrinodis | near Boi Taüll Ski Station      | 42.502111N | 0.857305E  | 1788m         | Spain   | 1            | Very short, flat, grazed alpine meadow.                                                    |
| 6.10.2010  | M. sabuleti    | Dartmoor                        | 50.456944N | 4.060277W  | 213m          | England | 3            | Lowland moor.                                                                              |
| 13.10.2010 | M. sabuleti    | Stoney Middleton                | 53.281111N | 1.687777W  | 244m          | England | 3            | Disused sheltered limestone quarry.                                                        |
| 18.5.2010  | M. sabuleti    | Slapton Ley                     | 50.300833N | 3.650277W  | 46m           | England | 3            | Open, grassy, inclined field.                                                              |
| 30.5.2011  | M. sabuleti    | Kenfig                          | 51.515555N | 3.741666W  | 9m            | Wales   | 3            | Coastal sand dunes.                                                                        |
| 6.10.2012  | M. sabuleti    | top of Mount Kerkini            | 41.314500N | 23.216166E | 1560m         | Greece  | 4            | Rocky alpine slope with herbs, grasses & scattered prostrate <i>Juniperus</i> .            |
| 6.10.2012  | M. sabuleti    | top of Mount Kerkini            | 41.315783N | 23.218116E | 1533m         | Greece  | 3            | Rocky alpine slope with herbs, grasses & scattered prostrate <i>Juniperus</i> .            |
| 6.10.2012  | M. sabuleti    | Mount Kerkini                   | 41.319166N | 23.202333E | 1480m         | Greece  | 2            | Wet glade on slope surrounded by <i>Fagus sylvaticus</i> forest.                           |
| 9.10.2012  | M. sabuleti    | Mount Kerkini                   | 41.341716N | 23.234066E | 1264m         | Greece  | 1            | Mixed woodland with <i>Fagus</i> , <i>Castanea</i> , & <i>Betula</i> .                     |
| 9.10.2012  | M. sabuleti    | Mount Kerkini                   | 41.315833N | 23.213566E | 1593m         | Greece  | 5            | Rocky alpine slope with herbs, grasses & scattered prostrate <i>Juniperus</i> .            |
| 9.10.2012  | M. sabuleti    | Mount Kerkini                   | 41.313066N | 23.213316E | 1582m         | Greece  | 3            | Rocky alpine slope with grasses, bracken & herbs.                                          |
| 18.6.2011  | M. sabuleti    | Val de Ruda                     | 42.671366N | 0.956666E  | 1595m         | Spain   | 5            | Meadow with stream.                                                                        |
| 18.6.2011  | M. sabuleti    | Mata de Valencia                | 42.639233N | 1.028350E  | 1574m         | Spain   | 1            | Glade on forest edge.                                                                      |
| 19.6.2011  | M. sabuleti    | Centre Natura Les Planes de Son | 42.618133N | 1.082000E  | 1536m         | Spain   | 2            | Alpine meadow.                                                                             |
| 20.6.2011  | M. sabuleti    | Val de Varradòs                 | 42.749100N | 0.761733E  | 949m          | Spain   | 1            | Flat, wet alpine meadow.                                                                   |
| 20.6.2011  | M. sabuleti    | Val de Varradòs                 | 42.776800N | 0.831966E  | 1560m         | Spain   | 1            | Flat, grazed meadow next to stream.                                                        |
| 21.6.2011  | M. sabuleti    | near Jou                        | 42.603116N | 1.116716E  | 1370m         | Spain   | 1            | Alpine meadow.                                                                             |
| 21.6.2011  | M. sabuleti    | near Plana de la Font from Jou  | 42.604583N | 1.101516E  | 1469m         | Spain   | 2            | Mixed broadleaf & conifer woodland.                                                        |
| 22.6.2011  | M. sabuleti    | Prats del Coro                  | 42.621777N | 1.071222E  | 1670m         | Spain   | 1            | Mosaic of meadow with bracken & <i>Juniperus communis</i> scrub.                           |
| 22.6.2011  | M. sabuleti    | Pas del Coro                    | 42.623361N | 1.061638E  | 1820m         | Spain   | 3            | Meadow with some boggy areas.                                                              |
| 23.6.2011  | M. sabuleti    | Bosc de Bonabé                  | 42.751805N | 1.084527E  | 1500m         | Spain   | 1            | Mosaic of meadow next to stream.                                                           |
| 18.6.2011  | M. schencki    | Val de Ruda                     | 42.671366N | 0.956666E  | 1595m         | Spain   | 1            | Meadow with stream.                                                                        |
| 22.6.2011  | M. schencki    | near Son                        | 42.633361N | 1.104444E  | 1193m         | Spain   | 2            | Grass meadow on steep slope.                                                               |
| 22.6.2011  | M. schencki    | Pas del Coro                    | 42.623361N | 1.061638E  | 1820m         | Spain   | 1            | Meadow with some boggy areas.                                                              |
| 22.6.2011  | M. schencki    | Esterrí d'Aneu                  | 42.623388N | 1.125333E  | 965m          | Spain   | 4            | Flat field left fallow for grazing horses.                                                 |
| 24.6.2011  | M. schencki    | near Isil                       | 42.693083N | 1.096305E  | 1255m         | Spain   | 1            | Stony, open & dry slope with Mediterranean flora.                                          |
| 27.6.2011  | M. schencki    | near Taüll                      | 42.511138N | 0.862750E  | 1658m         | Spain   | 1            | Open scrub of <i>Cytisus purgans</i> on mountain slope.                                    |
| 27.6.2011  | M. schencki    | Ribera de Sant Martí            | 42.509138N | 0.876222E  | 1702m         | Spain   | 1            | Flat, dry meadow next to river.                                                            |
| 18.8.2012  | M. schencki    | Joskär Island                   | 59.845491N | 23.254722E | 16m           | Finland | 3            | Open forest of <i>Pinus sylvestris</i> .                                                   |
| 19.8.2012  | M. schencki    | Hanko                           | 59.842033N | 23.247300E | 10m           | Finland | 1            | Coastal grass margins next to reed bed.                                                    |
| 19.8.2012  | M. schencki    | Hanko                           | 59.843033N | 23.237333E | 18m           | Finland | 2            | Open coniferous forest with large granite outcrops. Ground moss & lichen with boggy areas. |
| 20.8.2012  | M. schencki    | Hanko                           | 59.827700N | 23.015650E | 23m           | Finland | 2            | Coniferous forest with thick ground covering of moss and lichen.                           |
| 7.9.2012   | M. schencki    | Merthyr Mawr                    | 51.475383N | 3.639516W  | 12m           | Wales   | 5            | Successional coastal sand dunes                                                            |
| 20.8.2012  | M. rubra       | Hanko                           | 59.845116N | 23.207700E | 13m           | Finland | 2            | Inland sand dunes surrounded by <i>Pinus forest</i> . Ground covering of moss and lichen.  |
| 21.8.2012  | M. rubra       | Porsgrundet Island              | 59.842233N | 23.252516E | 8m            | Finland | 4            | Rocky, open grassy outcrops.                                                               |
| 22.8.2012  | M. rubra       | Tvärminneön                     | 59.843286N | 23.224966E | 8m            | Finland | 2            | Agricultural field with long grass.                                                        |
| 22.8.2012  | M. rubra       | Lappohja train station          | 59.904138N | 23.236741E | 28m           | Finland | 3            | Grassy verges.                                                                             |

| Date       | Species         | Location                          | Latitude    | Longitude  | Elevation | Country | No. colonies | Habitat                                                                                                                                                                             |
|------------|-----------------|-----------------------------------|-------------|------------|-----------|---------|--------------|-------------------------------------------------------------------------------------------------------------------------------------------------------------------------------------|
| 7.10.2012  | M. rubra        | Alder carr, Mount Kerkini         | 41.319166N  | 23.202333E | 62m       | Greece  | 2            | Alder carr next to stream.                                                                                                                                                          |
| 24.6.2011  | M. rubra        | Esterri d'Aneu                    | 42.618611N  | 1.125555E  | 950m      | Spain   | 3            | Grazed field and road margins                                                                                                                                                       |
| 25.6.2011  | M. rubra        | near Sarroca de Bellera           | 42.358777N  | 0.878277E  | 933m      | Spain   | 3            | Flat meadow and stream with riverine deciduous woodland.                                                                                                                            |
| 27.6.2011  | M. rubra        | towards Boi Taiill Ski Station    | 42.486055N  | 0.864388E  | 1913m     | Spain   | 1            | Alpine meadow on slope next to stream.                                                                                                                                              |
| 28.6.2011  | M. rubra        | Barruera                          | 42.500277N  | 0.800277E  | 1090m     | Spain   | 3            | Mosaic of riverside, wooded garden edges and fairly dry flat meadow                                                                                                                 |
| 8.4.2011   | M. rubra        | Cardiff                           | 51.541486N  | 3.201375W  | 103m      | Wales   | 3            | open grass mowed field                                                                                                                                                              |
| 19.8.2012  | M. ruginodis    | Hanko                             | 59.842033N  | 23.247300E | 10m       | Finland | 1            | Open coniferous forest with large granite outcrops. Ground moss & lichen with boggy areas.                                                                                          |
| 20.8.2012  | M. ruginodis    | Hanko                             | 59.827700N  | 23.015650E | 23m       | Finland | 1            | Coniferous forest with thick ground covering of moss and lichen.                                                                                                                    |
| 20.8.2012  | M. ruginodis    | Tvärminneön                       | 59.843286N  | 23.224966E | 8m        | Finland | 1            | Agricultural field with long grass.                                                                                                                                                 |
| 21.8.2012  | M. ruginodis    | Harparskog                        | 59.933033N  | 23.318883E | 17m       | Finland | 2            | Open bog with Sphagnum. Scattered small <i>Pinus</i> and <i>Betula</i> .                                                                                                            |
| 21.8.2012  | M. ruginodis    | Tvärminneön                       | 59.843983N  | 23.233233E | 4m        | Finland | 1            | Agricultural field with long grass.                                                                                                                                                 |
| 21.8.2012  | M. ruginodis    | Porsgrundet Island                | 59.842233N  | 23.252516E | 8m        | Finland | 1            | Rocky, open grassy outcrops.                                                                                                                                                        |
| 6.10.2012  | M. ruginodis    | Mount Kerkini                     | 41.319166N  | 23.202333E | 1480m     | Greece  | 4            | Glade on slope with some wet areas surrounded by forest of <i>Fagus sylvaticus</i> .                                                                                                |
| 18.6.2011  | M. ruginodis    | Mata de Valencia                  | 42.639233N  | 1.028350E  | 1574m     | Spain   | 1            | Glade on edge of <i>Abies alba</i> forest.                                                                                                                                          |
| 19.6.2011  | M. ruginodis    | Centre Natura Les Planes de Son   | 42.618133N  | 1.082000E  | 1536m     | Spain   | 1            | Alpine meadow.                                                                                                                                                                      |
| 19.6.2011  | M. ruginodis    | 3.4km from Son                    | 42.617583N  | 1.054450E  | 1902m     | Spain   | 1            | Open woodland of <i>Pinus nigra</i> alongside small glades with several streams.                                                                                                    |
| 20.6.2011  | M. ruginodis    | Val de Varradòs                   | 42.749100N  | 0.761733E  | 949m      | Spain   | 1            | Flat, wet meadow next to stream.                                                                                                                                                    |
| 20.6.2011  | M. ruginodis    | Val de Ruda                       | 42.643466N  | 0.822083E  | 1860m     | Spain   | 1            | Rocky meadow.                                                                                                                                                                       |
| 21.6.2012  | M. ruginodis    | near Jou                          | 42.603116N  | 1.116716E  | 1370m     | Spain   | 1            | Alpine meadow on slope.                                                                                                                                                             |
| 21.6.2011  | M. ruginodis    | Towards Plana de la Font from Jou | 42.604583N  | 1.101516E  | 1469m     | Spain   | 1            | Mixed broadleaf & conifer woodland.                                                                                                                                                 |
| 22.6.2011  | M. ruginodis    | near Son                          | 42.633361N  | 1.104444E  | 1193m     | Spain   | 1            | Meadow on steep slope.                                                                                                                                                              |
| 22.6.2011  | M. ruginodis    | Pas del Coro                      | 42.623361N  | 1.061638E  | 1820m     | Spain   | 1            | Meadow with some boggy areas.                                                                                                                                                       |
| 23.6.2011  | M. ruginodis    | Bosc de Bonabé                    | 42.751805N  | 1.084527E  | 1500m     | Spain   | 1            | Mosaic of meadow next to stream.                                                                                                                                                    |
| 21.6.2010  | M. ruginodis    | Surprise View                     | 53.317777N  | 1.626388W  | 318m      | England | 1            | Moorland with wooded areas.                                                                                                                                                         |
| 6.10.2010  | M. ruginodis    | Dartmoor                          | 50.456944N  | 4.060277W  | 213m      | England | 1            | Lowland moor.                                                                                                                                                                       |
| 13.10.2010 | M. ruginodis    | Fulwood Booth Farm                | 53.362669N  | 1.586294W  | 365m      | England | 2            | Upland moor with rocky outcrops.                                                                                                                                                    |
| 13.10.2010 | M. ruginodis    | Stoney Middleton                  | 53.281111N  | 1.687777W  | 244m      | England | 1            | Disused limestone quarry.                                                                                                                                                           |
| 13.07.2011 | M. aloba        | Montera del Torero, Cadiz         | 36.224967N  | 5.583917W  | 120m      | Spain   | 5            | Dense and moist riverine forest of <i>Quercus suber</i> , <i>Q. canariensis</i> & <i>Alnus glutinosa</i> .                                                                          |
| 19.08.2012 | M. lobicornis   | Hanko                             | 59.843033N  | 23.237333E | 18m       | Finland | 3            | Open forest of <i>Pinus sylvestris</i> , <i>Picea abies</i> , & <i>Betula</i> sp. with large rocky granite outcrops, ground moss and lichen, boggy areas.                           |
| 18.06.2011 | M. lobulicornis | Port de la Bonaigua               | 42.6640667N | 0.9807833E | 2075m     | Spain   | 1            | Alpine meadow.                                                                                                                                                                      |
| 21.06.2011 | M. lobulicornis | Refugi de la Plana de la Font     | 42.5954333N | 1.0744833E | 2070m     | Spain   | 3            | Alpine meadow on slope, bordered with woodland of <i>Pinus nigra</i> .                                                                                                              |
| 23.06.2011 | M. lobulicornis | Bosc de Bonabé                    | 42.7518056N | 1.0845278E | 1500m     | Spain   | 1            | Mosaic of meadow and forest edge with <i>Betula</i> & <i>Abies</i> , next to stream.                                                                                                |
| 19.06.2011 | M. specioides   | Centre Natura Les Planes de Son   | 42.618133N  | 1.081E     | 1536m     | Spain   | 1            | Mosaic of meadow and woodland with <i>Corylus avellana</i> , <i>Pinus nigra</i> , <i>Juniperus communis</i> , <i>Betula pendula</i> and <i>Rosa</i> sp.                             |
| 21.06.2011 | M. specioides   | near Jou                          | 42.603117N  | 1.116717E  | 1370m     | Spain   | 1            | Meadow on slope with scattered <i>Rosa</i> sp., <i>Juniperus communis</i> & <i>Pinus nigra</i> .                                                                                    |
| 22.06.2011 | M. specioides   | near Son                          | 38.001667N  | 1.104444E  | 1193m     | Spain   | 1            | Meadow on steep slope and surrounding woodland of <i>Quercus humilis</i> , <i>Fraxinus excelsior</i> , <i>Sorbus acuparia</i> , <i>Corylus avellana</i> & <i>Fagus sylvaticus</i> . |
| 23.06.2011 | M. specioides   | near Isil                         | 41.585N     | 1.096111E  | 1255m     | Spain   | 1            | Stony, open, sunny and dry slope with scattered <i>Rubus</i> sp. & <i>Rosa</i> sp.                                                                                                  |

| Date       | Species       | Location                        | Latitude    | Longitude  | Elevation | Country | No. colonies | Habitat                                                                                                                                                                             |
|------------|---------------|---------------------------------|-------------|------------|-----------|---------|--------------|-------------------------------------------------------------------------------------------------------------------------------------------------------------------------------------|
| 25.06.2011 | M. specioides | near Sarroca de Bellera         | 21.526667N  | 0.878056E  | 933m      | Spain   | 1            | Flat meadow and stream with riverine woodland of <i>Fagus sylvatica</i> , <i>Populus nigra</i> , <i>Corylus avellana</i> and <i>Crataegus monogyna</i> .                            |
| 26.06.2011 | M. specioides | near Els Castells               | 18.221667N  | 1.173889E  | 1630m     | Spain   | 1            | Flat mountain meadow.                                                                                                                                                               |
| 27.06.2011 | M. specioides | towards Boi Taitill Ski Station | 30.126667N  | 0.857222E  | 1788m     | Spain   | 1            | Very short, flat, grazed alpine meadow.                                                                                                                                             |
| 28.06.2011 | M. specioides | Barruera                        | 42.500278N  | 0.800278E  | 1090m     | Spain   | 1            | Mosaic of riverside, wooded garden edges and fairly dry flat meadow.                                                                                                                |
| 18.06.2011 | M. sulcinodis | Port de la Bonaigua             | 42.664067N  | 0.980783E  | 2075m     | Spain   | 3            | Alpine meadow with flatter areas and some ponds.                                                                                                                                    |
| 21.06.2011 | M. sulcinodis | Refugi de la Plana de la Font   | 42.595433N  | 1.074483E  | 2070m     | Spain   | 2            | Alpine meadow on slope, bordered with woodland of <i>Pinus nigra</i> .                                                                                                              |
| 22.06.2011 | M. vandeli    | Pas del Coro                    | 42.6233611N | 1.0616389E | 1811m     | Spain   | 1            | Meadow with boggy and dry areas, surrounded by forest of <i>Pinus nigra</i> , <i>Abies alba</i> and scrub of <i>Cytisus purgans</i> along forest edges.                             |
| 18.06.2011 | M. wesmaeli   | Mata de Valencia                | 42.639233N  | 1.02835E   | 1574m     | Spain   | 1            | Glade on edge of forest and interior of forest with <i>Abies alba</i> , <i>Betula pendula</i> & <i>Corylus avellana</i> .                                                           |
| 21.06.2011 | M. wesmaeli   | Near Jou                        | 42.603117N  | 1.116717E  | 1370m     | Spain   | 1            | Meadow on slope with scattered <i>Rosa</i> sp., <i>Juniperus communis</i> & <i>Pinus nigra</i> .                                                                                    |
| 22.06.2011 | M. wesmaeli   | Near Son                        | 38.001667N  | 1.104444E  | 1193m     | Spain   | 2            | Meadow on steep slope and surrounding woodland of <i>Quercus humilis</i> , <i>Fraxinus excelsior</i> , <i>Sorbus acuparia</i> , <i>Corylus avellana</i> & <i>Fagus sylvaticus</i> . |
| 22.06.2011 | M. wesmaeli   | Pas del Coro                    | 37.401667N  | 1.061389E  | 1811m     | Spain   | 1            | Meadow with boggy and dry areas, surrounded by forest of <i>Pinus nigra</i> , <i>Abies alba</i> and scrub of <i>Cytisus purgans</i> along forest edges.                             |
