# Supplementary material for: Species-Specific Cuticular Hydrocarbon Stability within European Myrmica Ants
Source: PubMed Central journal article supplement (PMC5119849; doi:10.1007/s10886-016-0784-x), 2016-11-10
Supplement: 10886_2016_784_MOESM2_ESM.pdf [file 10886_2016_784_MOESM2_ESM.pdf]

**Online Resource 2** Mean relative proportions %  $\pm$  s.d for populations of *Myrmica* (*M. scabrinodis* (scab), *M. sabuleti* (sab), *M. schencki* (sch), *M. rubra* (rub) and *M. ruginodis* (rug) from Finland (F), Spain (S), Britain (UK), and Greece (G). van = *M. vandeli*, spe = *M. specioides*, lob = *M. lobicornis*, lobu = *M. lobulicornis*, wes = *M. wesmaeli*, sul = *M. sulcinodis*, alo = *M. aloba*. RI = Retention Index. RI's were calculated relative to alkane standards based on van Den Dool and Kratz (1963). The Retention Indices of some compounds could not be calculated as no reference alkanes were available and these are indicated as -; *t* refers to trace compound <0.2%. \* = 1 isomer, \*\* = 2 isomers, \*\*\* = 3 isomers present within a compound. <sup>a</sup> = consists of a number of undetermined isomers based on RI. Compounds *in parentheses* consist of a minor component of that MS peak.

| Compound            | RI        | scabUK               | scabF                | scabS               | sabUK                | sabS                 | sabG                 | schUK | schF | schS | rubUK              | rubF               | rubS               | rubG               | rugUK | rugF | rugS | rugG | van      | spe                | lob                | lobu                  | wes                   | sul                  | alo                 |                    |
|---------------------|-----------|----------------------|----------------------|---------------------|----------------------|----------------------|----------------------|-------|------|------|--------------------|--------------------|--------------------|--------------------|-------|------|------|------|----------|--------------------|--------------------|-----------------------|-----------------------|----------------------|---------------------|--------------------|
| C21                 | 2100      |                      |                      |                     |                      |                      |                      |       |      |      |                    |                    |                    |                    |       |      |      |      | 1.63     |                    |                    |                       |                       |                      |                     |                    |
| 3-MeC21             | 2173      |                      |                      |                     |                      |                      |                      |       |      |      |                    |                    |                    |                    |       |      |      |      | 2.31     |                    |                    |                       |                       |                      |                     |                    |
| C22                 | 2200      | <i>t</i>             | <i>t</i>             | <i>t</i>            |                      |                      |                      |       |      |      |                    |                    |                    |                    |       |      |      |      | 0.64     | <i>t</i>           |                    |                       |                       | 0.29 $\pm$<br>0.10   |                     |                    |
| MeC23:2             | 2261      |                      |                      |                     |                      |                      |                      |       |      |      |                    |                    |                    |                    |       |      |      |      | <i>t</i> |                    |                    |                       |                       |                      |                     |                    |
| 3-MeC22             | 2271      | <i>t</i>             | <i>t</i>             | <i>t</i>            |                      |                      |                      |       |      |      |                    |                    |                    |                    |       |      |      |      | 0.60     |                    |                    |                       |                       |                      |                     |                    |
| C23:2               | 2271      |                      |                      |                     |                      |                      |                      |       |      |      |                    |                    |                    |                    |       |      |      |      |          |                    |                    |                       |                       |                      | <i>t</i>            |                    |
| C23:1 (all isomers) | 2275-2279 | 0.90 $\pm$<br>0.34 * | 0.61 $\pm$<br>0.12 * | 1.34 $\pm$<br>0.35  | 1.06 $\pm$<br>0.82 * | 1.42 $\pm$<br>0.47 * | 0.57 $\pm$<br>0.21 * |       |      |      |                    |                    |                    |                    |       |      |      |      | 2.93 *   | <i>t</i> *         |                    | 0.6 $\pm$<br>0.08 *** |                       | 0.20 $\pm$<br>0.13 * | <i>t</i> *          |                    |
| n-C23               | 2300      | 5.16 $\pm$<br>2.52   | 7.3 $\pm$<br>1.9     | 9.86 $\pm$<br>2.04  | 4.87 $\pm$<br>1.47   | 7.05 $\pm$<br>1.31   | 4.33 $\pm$<br>0.98   |       |      |      | 0.40 $\pm$<br>0.27 | 0.17 $\pm$<br>0.1  | 0.58 $\pm$<br>0.35 | <i>t</i>           |       |      |      |      | 9.43     | 7.94 $\pm$<br>2.04 |                    | 6.62 $\pm$<br>1.05    | <i>t</i>              | 5.04 $\pm$<br>1.21   | 9.78 $\pm$<br>1.68  |                    |
| 9-;11-;13-MeC23     | 2336      | <i>t</i>             | <i>t</i>             | <i>t</i>            | 0.52 $\pm$<br>0.73   | 0.21 $\pm$<br>0.06   | 0.17 $\pm$<br>0.06   |       |      |      |                    |                    |                    |                    |       |      |      |      |          | <i>t</i>           |                    |                       |                       | 2.91 $\pm$<br>0.73   |                     |                    |
| 7-MeC23             | 2341      | <i>t</i>             | <i>t</i>             | <i>t</i>            | <i>t</i>             | <i>t</i>             | <i>t</i>             |       |      |      |                    |                    |                    |                    |       |      |      |      |          | <i>t</i>           |                    |                       |                       |                      | 0.34 $\pm$<br>0.06  |                    |
| 5-MeC23             | 2351      | <i>t</i>             | <i>t</i>             | <i>t</i>            | 1.66 $\pm$<br>0.49   | 3.2 $\pm$<br>1.37    | 3.14 $\pm$<br>0.89   |       |      |      | 0.33 $\pm$<br>0.13 | 0.33 $\pm$<br>0.17 | 0.43 $\pm$<br>0.28 | 0.16 $\pm$<br>0.03 |       |      |      |      |          | <i>t</i>           |                    |                       |                       | <i>t</i>             | 1.70 $\pm$<br>0.57  |                    |
| unknown             | 2358      |                      |                      |                     |                      |                      |                      |       |      |      |                    |                    |                    |                    |       |      |      |      | 0.3      |                    |                    |                       |                       |                      |                     |                    |
| 4-MeC23             | 2361      | <i>t</i>             | <i>t</i>             | <i>t</i>            |                      |                      |                      |       |      |      |                    |                    |                    |                    |       |      |      |      | <i>t</i> | <i>t</i>           |                    |                       |                       |                      |                     |                    |
| 3-MeC23             | 2374      | 11.08 $\pm$<br>2.63  | 15.96 $\pm$<br>2.84  | 12.76 $\pm$<br>3.39 | 0.65 $\pm$<br>0.48   | 1.74 $\pm$<br>1.13   | 0.70 $\pm$<br>0.41   |       |      |      |                    |                    |                    |                    |       |      |      |      |          | 18.70              | <i>t</i>           |                       | <i>t</i>              |                      | 12.03 $\pm$<br>1.23 | 1.28 $\pm$<br>0.11 |
| C24:1 <sup>a</sup>  | 2371-2394 | 0.3 $\pm$<br>0.3     | 0.02 $\pm$<br>0.08   | 0.79 $\pm$<br>0.26  | 0.65 $\pm$<br>0.26   | 0.55 $\pm$<br>0.21   | 0.67 $\pm$<br>0.12   |       |      |      |                    |                    |                    |                    |       |      |      |      |          | 0.36               |                    |                       | 0.79 $\pm$<br>0.05 ** |                      |                     | <i>t</i>           |
| n-C24               | 2400      | 0.27 $\pm$<br>0.11   | 0.45 $\pm$<br>0.14   | 0.81 $\pm$<br>0.21  | 0.25 $\pm$<br>0.25   | 0.30 $\pm$<br>0.06   | 0.14 $\pm$<br>0.02   |       |      |      |                    |                    |                    |                    |       |      |      |      |          | 0.77               | 0.21 $\pm$<br>0.43 |                       | 0.4 $\pm$<br>0.07     |                      | 1.77 $\pm$<br>0.55  | 0.81 $\pm$<br>0.31 |
| 3,13-diMeC23        | 2409      |                      |                      |                     |                      |                      |                      |       |      |      |                    |                    |                    |                    |       |      |      |      |          |                    |                    |                       |                       |                      | 3.87 $\pm$<br>1.60  |                    |
| 3,7-diMeC23         | 2410      | <i>t</i>             | <i>t</i>             | <i>t</i>            | <i>t</i>             | <i>t</i>             | <i>t</i>             |       |      |      |                    |                    |                    |                    |       |      |      |      |          | <i>t</i>           |                    |                       | 0.30 $\pm$<br>0.26    |                      |                     |                    |
| 8-;11-;12-;14-MeC24 | 2435      |                      |                      |                     |                      |                      |                      |       |      |      |                    |                    |                    |                    |       |      |      |      |          |                    |                    |                       |                       |                      | 4.10 $\pm$<br>0.64  |                    |

| Compound             | RI        | scabUK           | scabF            | scabS            | sabUK           | sabS            | sabG              | schUK    | schF     | schS     | rubUK          | rubF           | rubS           | rubG           | rugUK          | rugF     | rugS           | rugG           | van     | spe               | lob      | lobu               | wes            | sul             | alo             |
|----------------------|-----------|------------------|------------------|------------------|-----------------|-----------------|-------------------|----------|----------|----------|----------------|----------------|----------------|----------------|----------------|----------|----------------|----------------|---------|-------------------|----------|--------------------|----------------|-----------------|-----------------|
| 5-MeC24              | 2452      |                  |                  |                  | 0.37 ±<br>0.19  | 0.34 ±<br>0.08  | 0.17 ±<br>0.13    |          |          |          |                |                |                |                |                |          |                |                |         |                   |          |                    |                |                 | 0.28 ±<br>0.04  |
| 4-MeC24              | 2460      | <i>t</i>         |                  | <i>t</i>         |                 |                 |                   |          |          |          |                |                |                |                |                |          |                |                |         | <i>t</i>          |          |                    |                | <i>t</i>        | 0.20 ±<br>0.04  |
| MeC25:2 <sup>a</sup> | 2443-2463 | 1.01 ±<br>0.85   | <i>t</i>         | <i>t</i>         |                 |                 |                   |          |          |          |                |                |                |                |                |          |                |                | 16.76   |                   |          |                    |                |                 |                 |
| 3-MeC24+C25:2        | 2473      |                  |                  |                  |                 |                 |                   |          |          |          |                |                |                |                |                |          |                |                |         |                   |          |                    |                |                 | 1.18 ±<br>0.29  |
| C25:2 <sup>a</sup>   | 2465-2489 | 6.85 ±<br>12.25  | 23.3 ±<br>20.91  | 19.78 ±<br>22.82 |                 |                 |                   |          |          |          |                |                |                |                |                |          |                |                |         |                   |          |                    |                |                 | 57.98 ±<br>5.67 |
| C25:1 (all isomers)  | 2472-2497 | 66.57 ±<br>16.97 | 45.62 ±<br>19.22 | 44.24 ±<br>22.37 | 59.77 ±<br>3.58 | 47.24 ±<br>3.48 | 49.96 ±<br>± 4.66 | <i>t</i> | <i>t</i> | <i>t</i> | 0.14 ±<br>0.12 | 0.51 ±<br>0.27 | 0.91 ±<br>0.58 | 0.76 ±<br>0.35 | <i>t</i>       | <i>t</i> | <i>t</i>       | <i>t</i>       | 31.37** | 0.47 ±<br>0.25 ** |          | 69.01 ±<br>2.39 ** | 0.27 ±<br>0.59 | 1.68 ±<br>0.77  |                 |
| (Z)-12-C25:1         | 2472      | 3.11             |                  |                  | 94.05           | 96.01           | 94.89             |          |          |          |                |                |                |                |                |          |                |                |         |                   |          |                    |                |                 |                 |
| (Z)-11-C25:1         | 2479      |                  |                  |                  | 1.4             | 3.45            | 4.86              |          |          |          |                |                |                |                |                |          |                |                |         |                   |          |                    |                |                 |                 |
| (Z)-9-C25:1          | 2478      | 96.89            | 98.68            | 98.37            | 4.55            | 0.54            | 0.25              |          |          |          |                |                |                |                |                |          |                |                |         |                   |          |                    |                |                 |                 |
| (Z)-7-C25:1          | 2483      |                  | 1.32             | 1.63             |                 |                 |                   |          |          |          |                |                |                |                |                |          |                |                |         |                   |          |                    |                |                 |                 |
| 4,10-diMeC24         | 2493      |                  |                  |                  |                 |                 |                   |          |          |          |                |                |                |                |                |          |                |                |         |                   |          |                    |                |                 | 0.32 ±<br>0.08  |
| unknown              | 2494      |                  |                  |                  |                 |                 |                   |          |          |          |                |                |                |                |                |          |                |                |         |                   |          |                    |                |                 | 2.18 ±<br>2.10  |
| n-C25                | 2500      | 1.66 ±<br>0.84   | 2.3 ±<br>0.52    | 4.36 ±<br>1.06   | 2.79 ±<br>1.22  | 4.79 ±<br>1.3   | 3.13 ±<br>0.55    |          |          |          | 3.1 ±<br>2.21  | 2.98 ±<br>1.3  | 6.09 ±<br>2.82 | 3.48 ±<br>1.5  | 0.36 ±<br>0.16 | <i>t</i> | 0.35 ±<br>0.13 | 0.38 ±<br>0.32 | 4.48    | 1.97 ±<br>0.56    |          | 3.88 ±<br>0.77     | 0.3 ±<br>0.1   | 5.48 ±<br>2.36  | 3.49 ±<br>2.54  |
| 3,11-diMeC24         | 2507      |                  |                  |                  |                 |                 |                   |          |          |          |                |                |                |                |                |          |                |                |         |                   |          |                    |                |                 | 0.26 ±<br>0.03  |
| unknown              | 2509      |                  |                  |                  |                 |                 |                   |          |          |          |                |                |                |                |                |          |                |                |         |                   |          |                    |                |                 | 0.48 ±<br>0.14  |
| unknown              | 2520      |                  |                  |                  | 0.47 ±<br>0.14  | 0.57 ±<br>0.17  | 1.02 ±<br>0.25    |          |          |          |                |                |                |                |                |          |                |                |         |                   |          |                    |                |                 |                 |
| 9-,11-,13-MeC25      | 2534      | <i>t</i>         | <i>t</i>         | <i>t</i>         | 1.57 ±<br>0.53  | 2.01 ±<br>0.52  | 2.47 ±<br>0.57    |          |          |          | 1.43 ±<br>0.29 | 2.49 ±<br>1.0  | 4.21 ±<br>1.21 | 1.24 ±<br>0.01 |                |          |                |                | 0.22    | 0.23 ±<br>0.13    | <i>t</i> | 1.03 ±<br>0.27     |                | 23.34 ±<br>1.26 | 0.21 ±<br>0.13  |
| 7-MeC25              | 2542      | <i>t</i>         | <i>t</i>         | <i>t</i>         | 0.70 ±<br>0.34  | 0.39 ±<br>0.23  | 0.28 ±<br>0.06    |          |          |          | 1.28 ±<br>0.4  | 1.44 ±<br>1.14 | 2.11 ±<br>0.6  | 1.12 ±<br>0.08 |                |          |                |                |         | <i>t</i>          |          |                    |                |                 |                 |
| unknown              | 2550      |                  |                  |                  |                 |                 |                   |          |          |          |                |                |                |                |                |          |                |                | 1.39    |                   |          |                    |                |                 |                 |
| 5-MeC25              | 2552      | 0.72 ±<br>0.65   | 0.44 ±<br>0.25   | 1.37 ±<br>1.13   | 13.67 ±<br>2.17 | 18.27 ±<br>2.64 | 12.7 ±<br>2.9     |          |          |          | 2.35 ±<br>0.47 | 3.6 ±<br>1.24  | 2.38 ±<br>0.65 | 2.66 ±<br>0.02 |                |          | <i>t</i>       | <i>t</i>       |         | 0.87 ±<br>0.37    |          | 0.69 ±<br>0.25     |                | 0.64 ±<br>0.07  | 15.28 ±<br>1.73 |
| 4-MeC25              | 2562      |                  | <i>t</i>         | <i>t</i>         |                 |                 |                   |          |          |          |                |                |                |                |                |          |                |                |         | <i>t</i>          |          |                    |                |                 |                 |
| 11,15+9,13-diMeC25   | 2565      |                  |                  |                  |                 |                 |                   |          |          |          |                |                | 0.42 ±<br>0.3  |                |                |          |                |                |         |                   |          |                    |                |                 |                 |
| 9,13-diMeC25         | 2567      |                  |                  |                  |                 |                 |                   |          |          |          | 0.48 ±<br>0.14 | 0.74 ±<br>0.4  | 0.07 ±<br>0.16 | 0.51 ±<br>0.01 |                |          |                |                |         |                   |          |                    |                |                 |                 |
| 9,13+9,15-diMeC25    | 2569      |                  |                  |                  |                 |                 |                   |          |          |          |                |                |                |                |                |          |                |                |         |                   |          |                    |                |                 | 1.92 ±<br>0.40  |
| C26:1 <sup>a</sup>   | 2569-2577 |                  |                  |                  | 0.81 ±<br>0.26  |                 | 1.05 ±<br>0.16    |          |          |          |                |                |                |                |                |          |                |                |         |                   |          |                    | 0.53 ±<br>0.08 |                 |                 |

| Compound                        | RI        | scabUK         | scabF         | scabS          | sabUK          | sabS           | sabG           | schUK | schF | schS | rubUK          | rubF           | rubS           | rubG           | rugUK | rugF | rugS | rugG     | van      | spe            | lob | lobu              | wes            | sul            | alo             |                |
|---------------------------------|-----------|----------------|---------------|----------------|----------------|----------------|----------------|-------|------|------|----------------|----------------|----------------|----------------|-------|------|------|----------|----------|----------------|-----|-------------------|----------------|----------------|-----------------|----------------|
| 7,11+7,15-diMeC25<br>(+3-MeC25) | 2574      |                |               |                |                |                |                |       |      |      | 0.86 ±<br>0.21 | 2.12 ±<br>0.93 | 1.49 ±<br>0.36 | 1.06 ±<br>0.04 |       |      |      |          |          |                |     |                   |                |                |                 |                |
| 3-MeC25                         | 2574      | 0.57 ±<br>0.22 | 1.53 ±<br>0.6 | 1.54 ±<br>0.58 | 0.60 ±<br>0.39 | 1.9 ±<br>0.34  | 0.84 ±<br>0.53 |       |      |      |                |                |                |                |       |      |      |          | 1.26     | 0.43 ±<br>0.18 |     | 0.987 ±<br>0.18   | <i>t</i>       | 7.69 ±<br>0.79 | 0.71 ±<br>0.71  |                |
| 5,9-diMeC25                     | 2583      | <i>t</i>       | <i>t</i>      | <i>t</i>       |                |                |                |       |      |      |                | 0.36 ±<br>0.15 |                | 0.29 ±<br>0.02 |       |      |      |          |          |                |     |                   |                |                |                 | 0.33 ±<br>0.03 |
| 5,11-diMeC25                    | 2583      |                |               |                |                |                |                |       |      |      | 0.97 ±<br>0.06 |                | 1.19 ±<br>0.4  |                |       |      |      |          |          |                |     |                   |                |                |                 |                |
| 5,15-diMeC25                    | 2583      |                |               |                |                |                |                |       |      |      |                |                |                |                |       |      |      |          |          |                |     |                   |                | 0.65 ±<br>0.07 |                 |                |
| 5,17-diMeC25                    | 2584      | <i>t</i>       | <i>t</i>      | <i>t</i>       |                |                |                |       |      |      |                |                |                |                |       |      |      |          |          |                |     |                   |                |                |                 | <i>t</i>       |
| n-C26                           | 2600      | <i>t</i>       | <i>t</i>      | <i>t</i>       |                | <i>t</i>       | <i>t</i>       |       |      |      | 0.34 ±<br>0.2  | 0.26 ±<br>0.09 | 0.57 ±<br>0.23 | 0.42 ±<br>0.22 |       |      |      |          | <i>t</i> | <i>t</i>       |     | 0.24 ±<br>0.15    | 0.25 ±<br>0.42 |                |                 | <i>t</i>       |
| 7,11,15-triMeC25                | 2601      |                |               |                |                |                |                |       |      |      |                |                |                |                |       |      |      |          |          |                |     |                   |                | 0.72 ±<br>0.1  |                 |                |
| 3,13-diMeC25                    | 2609      |                |               |                | 0.42 ±<br>0.17 | 0.33 ±<br>0.08 | 0.34 ±<br>0.09 |       |      |      |                |                |                |                |       |      |      |          |          |                |     |                   |                |                | 13.92 ±<br>1.96 |                |
| 3,9-diMeC25                     | 2609      | <i>t</i>       |               | <i>t</i>       |                |                |                |       |      |      |                |                |                |                |       |      |      |          | <i>t</i> |                |     |                   |                |                |                 |                |
| 3,7-diMeC25                     | 2610      |                |               |                |                |                |                |       |      |      | 0.45 ±<br>0.06 | 0.17 ±<br>0.16 | 0.48 ±<br>0.09 |                |       |      |      |          |          |                |     |                   | 0.95 ±<br>0.39 |                |                 |                |
| 10-,12-,14-MeC26                | 2633      |                |               |                |                |                |                |       |      |      | 0.69 ±<br>0.06 | 0.88 ±<br>0.36 | 1.34 ±<br>0.14 | 0.47 ±<br>0.01 |       |      |      | <i>t</i> |          | <i>t</i>       |     |                   |                |                | 1.91 ±<br>0.13  |                |
| 8-MeC26                         | 2639      |                |               |                |                |                |                |       |      |      | 0.26 ±<br>0.08 | 0.44 ±<br>0.14 | 0.63 ±<br>0.18 | 0.51 ±<br>0.01 |       |      |      |          |          |                |     |                   |                |                |                 |                |
| 3,7,11-triMeC25                 | 2641      |                |               |                |                |                |                |       |      |      |                |                |                |                |       |      |      |          |          |                |     |                   |                |                | 0.55 ±<br>0.27  |                |
| 6-MeC26                         | 2646      |                |               |                |                |                |                |       |      |      | <i>t</i>       | <i>t</i>       | <i>t</i>       | <i>t</i>       |       |      |      |          |          |                |     |                   |                |                |                 |                |
| MeC27:2                         | 2648      | <i>t</i>       |               |                |                |                |                |       |      |      |                |                |                |                |       |      |      |          |          |                |     |                   |                |                |                 |                |
| 5-MeC26                         | 2651      |                |               |                | <i>t</i>       | <i>t</i>       | <i>t</i>       |       |      |      | <i>t</i>       | <i>t</i>       | <i>t</i>       | <i>t</i>       |       |      |      | <i>t</i> |          |                |     |                   |                |                |                 |                |
| unknown                         | 2654      |                |               |                |                |                |                |       |      |      |                |                |                |                |       |      |      |          | 0.44     |                |     |                   |                |                |                 |                |
| C27:2 <sup>a</sup>              | 2655-2677 | <i>t</i>       | <i>t</i>      | 0.29 ±<br>0.34 |                |                |                |       |      |      |                |                |                |                |       |      |      |          |          |                |     | 0.90 ±<br>0.16 ** |                |                |                 |                |
| 4-MeC26                         | 2659      |                |               |                |                | <i>t</i>       |                |       |      |      | <i>t</i>       | <i>t</i>       | <i>t</i>       | <i>t</i>       |       |      |      |          |          |                |     |                   |                |                |                 |                |
| MeC27:2                         | 2662      |                |               |                |                |                |                |       |      |      |                |                |                |                |       |      |      |          | 0.78     |                |     |                   |                |                |                 |                |
| 10,14-diMeC26                   | 2665      |                |               |                |                |                |                |       |      |      | 0.91 ±<br>0.17 | 0.35 ±<br>0.12 | 0.63 ±<br>0.19 | 0.22 ±<br>0.06 |       |      |      |          |          |                |     |                   |                |                |                 |                |
| 8,12-diMeC26                    | 2668      |                |               |                |                |                |                |       |      |      | 0.16 ±<br>0.14 | 0.56 ±<br>0.17 | 0.26 ±<br>0.15 | 0.47 ±<br>0.01 |       |      |      |          |          |                |     |                   |                |                | 0.80 ±<br>0.16  |                |
| unknown                         | 2672      |                |               |                |                |                |                |       |      |      |                |                |                |                |       |      |      |          |          |                |     |                   |                |                |                 | 1.95 ±<br>0.37 |
| 6,10-diMeC26                    | 2677      |                |               |                |                |                |                |       |      |      | 0.41 ±<br>0.17 | 0.24 ±<br>0.11 | 0.41 ±<br>0.2  | <i>t</i>       |       |      |      |          |          |                |     |                   |                |                |                 |                |
| unknown                         | 2688      |                |               |                |                |                |                |       |      |      |                |                |                |                |       |      |      |          |          |                |     |                   |                |                |                 | 0.41 ±<br>0.06 |

| Compound                       | RI        | scabUK             | scabF              | scabS              | sabUK          | sabS           | sabG           | schUK          | schF           | schS           | rubUK            | rubF             | rubS             | rubG             | rugUK             | rugF              | rugS              | rugG              | van     | spe               | lob            | lobu               | wes            | sul              | alo            |          |
|--------------------------------|-----------|--------------------|--------------------|--------------------|----------------|----------------|----------------|----------------|----------------|----------------|------------------|------------------|------------------|------------------|-------------------|-------------------|-------------------|-------------------|---------|-------------------|----------------|--------------------|----------------|------------------|----------------|----------|
| C27:1 (all isomers)            | 2670-2698 | 0.76 ±<br>0.31 *** | 0.75 ±<br>0.15 *** | 0.94 ±<br>0.22 *** | 6.44 ±<br>1.71 | 6.15 ±<br>1.51 | 12.77<br>±2.9  |                |                |                | <i>t</i> **      | 0.59 ±<br>0.21** | 0.81 ±<br>0.41** | 1.79 ±<br>0.97** | 0.49 ±<br>0.63*** | 0.06 ±<br>0.03*** | 0.34 ±<br>0.16*** | 0.34 ±<br>0.19*** | 1.59*** | 4.57 ±<br>1.35 ** |                | 8.89 ±<br>0.96 *** | <i>t</i> **    | 0.82 ±<br>0.39 * |                |          |
| (Z)-13-C27:1                   | 2672      |                    |                    |                    | 100            | 100            | 100            |                |                |                |                  |                  |                  |                  |                   |                   |                   |                   |         |                   |                |                    |                |                  |                |          |
| 4,12-diMeC26                   | 2691      |                    |                    |                    |                |                |                |                |                |                |                  |                  |                  |                  |                   |                   |                   |                   |         |                   |                |                    |                |                  | 0.32 ±<br>0.08 |          |
| 4,8-diMeC26                    | 2692      |                    |                    |                    |                |                |                |                |                |                |                  |                  | 0.23 ±<br>0.12   |                  |                   |                   |                   |                   |         |                   |                |                    |                |                  |                |          |
| n-C27                          | 2700      | 0.22 ±<br>0.14     | 0.23 ±<br>0.07     | 0.56 ±<br>0.15     | 0.26 ±<br>0.23 | 0.39 ±<br>0.16 | 0.34 ±<br>0.06 | 0.26 ±<br>0.09 | 0.23 ±<br>0.17 | 0.67 ±<br>0.2  | 1.92 ±<br>1.18   | 1.37 ±<br>0.52   | 2.64 ±<br>0.77   | 2.33 ±<br>1.04   | 3.24 ±<br>1.93    | 0.95 ±<br>0.47    | 3.44 ±<br>1.06    | 2.04 ±<br>1.5     | 0.54    | 1.89 ±<br>0.46    | 2.30 ±<br>0.41 | 1.18 ±<br>0.47     | 2.08 ±<br>0.55 | 0.68 ±<br>0.24   | 0.64 ±<br>0.28 |          |
| unknown                        | 2719      |                    |                    |                    | 1.29 ±<br>0.45 | 0.96 ±<br>0.37 | 1.71 ±<br>0.37 |                |                |                |                  |                  |                  |                  |                   |                   |                   |                   |         |                   |                |                    |                |                  |                |          |
| 4,8,12-triMeC26<br>+ MeC27:1   | 2723      |                    |                    |                    |                |                |                |                |                |                | 0.22 ±<br>0.03   | 0.68 ±<br>0.32   | 0.71 ±<br>0.12   | 0.65 ±<br>0.92   |                   |                   |                   |                   |         |                   |                |                    |                |                  |                |          |
| 9-,11-,13-MeC27                | 2733      | <i>t</i>           | <i>t</i>           | <i>t</i>           | <i>t</i>       | 0.34 ±<br>0.11 | 0.54 ±<br>0.09 | 0.18 ±<br>0.06 | <i>t</i>       | 0.34 ±<br>0.17 | 16.72 ±<br>±1.21 | 20.16 ±<br>±5.97 | 21.71 ±<br>±1.54 | 16.89 ±<br>±2.18 | 1.58 ±<br>1.24    | 0.66 ±<br>0.31    | 0.83 ±<br>0.34    | 3.49 ±<br>0.78    |         | 1.84 ±<br>0.37    | 0.36 ±<br>0.26 | 1.18 ±<br>0.30     | 0.29 ±<br>0.11 | 3.22 ±<br>0.60   | 0.21 ±<br>0.1  |          |
| 7-MeC27                        | 2742      | <i>t</i>           | <i>t</i>           | <i>t</i>           |                |                |                | <i>t</i>       | <i>t</i>       | <i>t</i>       | 1.83 ±<br>0.43   | 2.32 ±<br>1.75   | 1.94 ±<br>0.5    | 2.33 ±<br>0.23   | 0.41 ±<br>0.21    | 0.63 ±<br>0.51    | 0.86 ±<br>0.92    | 1.4 ±<br>0.71     |         | 1.01 ±<br>0.20    |                | <i>t</i>           | <i>t</i>       |                  |                |          |
| 5-MeC27                        | 2752      | <i>t</i>           | <i>t</i>           | <i>t</i>           | 1.33 ±<br>0.38 | 1.88 ±<br>0.52 | 1.76 ±<br>0.43 | <i>t</i>       | <i>t</i>       | <i>t</i>       | 4.24 ±<br>1.00   | 5.81 ±<br>1.67   | 4.39 ±<br>1.05   | 4.41 ±<br>0.01   | 1.25 ±<br>0.89    | 0.7 ±<br>0.43     | 1.66 ±<br>1.21    | 3.61 ±<br>0.86    |         | 4.69 ±<br>0.79    | <i>t</i>       | 0.38 ±<br>0.41     | <i>t</i>       | <i>t</i>         | 0.60 ±<br>0.08 |          |
| 11,15+9,13-diMeC27             | 2766      |                    |                    |                    |                |                |                |                |                |                | 8.14 ±<br>1.04   | 5.86 ±<br>2.02   | 4.06 ±<br>1.4    | 4.6 ±<br>0.25    | <i>t</i>          |                   | <i>t</i>          | 0.73 ±<br>0.24    |         |                   |                |                    |                |                  |                |          |
| 9,15-diMeC27                   | 2767      |                    |                    |                    |                |                |                | <i>t</i>       | <i>t</i>       |                |                  |                  |                  |                  |                   |                   |                   |                   |         |                   |                |                    |                |                  | 0.87 ±<br>0.22 |          |
| 7,11-diMeC27<br>(+3-MeC27)     | 2773      |                    |                    |                    |                |                |                | 0.64 ±<br>0.31 | 0.69 ±<br>0.38 | 1.14 ±<br>0.39 | 4.64 ±<br>0.3    | 11.25 ±<br>±2.18 | 4.66 ±<br>1.03   | 16.13 ±<br>±2.34 |                   |                   |                   |                   |         |                   |                |                    |                |                  |                |          |
| 7,15-diMeC27<br>(+3-MeC27)     | 2774      |                    |                    |                    |                |                |                |                |                |                |                  |                  |                  |                  | 0.62 ±<br>0.28    | 0.7 ±<br>0.59     | 0.71 ±<br>0.51    | 2.24 ±<br>0.9     |         |                   |                |                    |                |                  |                |          |
| 7,17-diMe<br>(+3-MeC27)        | 2774      |                    |                    |                    |                |                |                |                |                |                |                  |                  |                  |                  |                   |                   |                   |                   |         | 0.94 ±<br>0.32    |                |                    |                |                  |                |          |
| 3-MeC27                        | 2774      |                    | <i>t</i>           | <i>t</i>           | <i>t</i>       | <i>t</i>       | <i>t</i>       |                |                |                |                  |                  |                  |                  |                   |                   |                   |                   | 0.26    |                   | 3.63 ±<br>0.63 | 0.47 ±<br>0.21     | 1.83 ±<br>0.52 | 0.65 ±<br>0.10   | <i>t</i>       |          |
| 5,17-<br>diMeC27(+C28:1)       | 2783      |                    |                    |                    |                |                |                |                |                |                |                  |                  |                  |                  |                   |                   |                   |                   |         | 2.80 ±<br>0.87    |                |                    |                |                  |                |          |
| 5,15-diMeC27<br>+ 5,17-diMeC27 | 2784      | <i>t</i>           | <i>t</i>           | <i>t</i>           | <i>t</i>       | <i>t</i>       | <i>t</i>       |                |                |                |                  |                  |                  |                  |                   |                   |                   |                   |         |                   |                |                    |                |                  |                |          |
| 5,15-diMeC27                   | 2784      |                    |                    |                    |                |                |                |                |                |                |                  |                  |                  |                  |                   |                   |                   |                   |         |                   |                |                    |                |                  | 0.34 ±<br>0.02 |          |
| 5,11-dimeC27                   | 2785      |                    |                    |                    |                |                |                |                |                |                | 6.24 ±<br>0.57   | 1.44 ±<br>2.03   | 7.83 ±<br>2.92   | 1.59 ±<br>0.32   | 0.20 ±<br>0.19    | <i>t</i>          | <i>t</i>          | 1.20 ±<br>0.55    |         |                   |                |                    |                |                  |                | <i>t</i> |
| 5,9, 5,15 & 5,17-<br>diMeC27   | 2789      |                    |                    |                    |                |                |                |                |                |                |                  | 1.64 ±<br>1.34   |                  |                  |                   |                   |                   |                   |         |                   |                |                    |                |                  |                |          |
| n-C28                          | 2800      |                    |                    |                    |                |                |                |                |                | <i>t</i>       |                  |                  |                  |                  | <i>t</i>          | <i>t</i>          | <i>t</i>          | <i>t</i>          |         | 0.21 ±<br>0.04    | <i>t</i>       |                    | <i>t</i>       |                  |                |          |
| 7,11,15-triMeC27               | 2801      |                    |                    |                    |                |                |                |                |                |                | 0.37 ±<br>0.12   | 1.23 ±<br>0.88   | 0.23 ±<br>0.06   | 2.32 ±<br>0.14   |                   |                   |                   |                   |         |                   |                |                    |                |                  | 0.25 ±<br>0.04 |          |
| 7,11,17-triMeC27               | 2803      |                    |                    |                    |                |                |                |                |                |                | 0.54 ±<br>0.06   | 0.71 ±<br>0.83   | 0.28 ±<br>0.05   | 1.25 ±<br>0.27   |                   |                   |                   |                   |         |                   |                |                    |                |                  |                |          |
| 3,15-diMeC27                   | 2808      |                    |                    |                    |                |                |                |                |                |                |                  | 0.36 ±<br>0.53   |                  |                  |                   |                   |                   |                   |         |                   |                |                    |                |                  | 0.80 ±<br>0.21 |          |

| Compound                          | RI        | scabUK             | scabF              | scabS              | sabUK          | sabS           | sabG           | schUK          | schF           | schS           | rubUK          | rubF           | rubS           | rubG           | rugUK            | rugF           | rugS           | rugG             | van  | spe                | lob                 | lobu              | wes               | sul               | alo      |
|-----------------------------------|-----------|--------------------|--------------------|--------------------|----------------|----------------|----------------|----------------|----------------|----------------|----------------|----------------|----------------|----------------|------------------|----------------|----------------|------------------|------|--------------------|---------------------|-------------------|-------------------|-------------------|----------|
| 3,9-diMeC27                       | 2808      |                    |                    |                    |                |                |                |                |                |                |                |                |                |                |                  |                |                |                  |      | <i>t</i>           |                     |                   |                   |                   |          |
| 3,7-diMeC27                       | 2810      |                    |                    |                    |                |                |                |                |                | 0.55 ±<br>0.22 |                |                |                |                |                  |                |                |                  |      |                    |                     | 0.22 ±<br>0.22    | 0.53 ±<br>0.96    |                   |          |
| 5,9,13-triMeC27<br>(+3,7-diMeC27) | 2811      |                    |                    |                    |                |                |                |                |                |                | 2.16 ±<br>0.21 | 0.85 ±<br>0.43 | 2.24 ±<br>0.56 | 1.71 ±<br>0.32 |                  |                |                |                  |      |                    |                     |                   |                   |                   |          |
| 5,9,17-triMeC27                   | 2825      |                    |                    |                    |                |                |                |                |                |                | 0.14 ±<br>0.15 | <i>t</i>       | 0.16 ±<br>0.01 |                |                  |                |                |                  |      |                    |                     |                   |                   |                   |          |
| 10-;12-;13-;14-<br>MeC28          | 2834      |                    |                    |                    |                |                |                |                |                |                | 1.4 ±<br>0.22  | 1.39 ±<br>0.4  | 1.85 ±<br>0.17 | 0.92 ±<br>0.03 | 0.56 ±<br>0.24   | 0.41 ±<br>0.12 | 0.45 ±<br>0.13 | 0.8 ±<br>0.15    |      | 0.35 ±<br>0.14     |                     |                   |                   |                   |          |
| 3,7,11-triMeC27                   | 2840      |                    |                    |                    |                |                |                |                |                |                | 1.04 ±<br>0.15 | 0.7 ±<br>0.35  | 1.46 ±<br>0.4  | 1.05 ±<br>0.1  |                  |                |                |                  |      |                    |                     |                   |                   |                   |          |
| 3,7,13-triMeC27<br>(+8-MeC28)     | 2840      |                    |                    |                    |                |                |                | 0.71 ±<br>0.19 | 0.58 ±<br>0.17 | 1.38 ±<br>0.44 |                |                |                |                |                  |                |                |                  |      |                    |                     |                   |                   |                   |          |
| 8-MeC28                           | 2840      |                    |                    |                    |                |                |                |                |                |                |                |                |                |                | <i>t</i>         | <i>t</i>       | <i>t</i>       | <i>t</i>         |      |                    |                     |                   |                   |                   |          |
| MeC29:2                           | 2850      | 0.72 ±<br>0.8      | <i>t</i>           |                    |                |                |                |                |                |                |                |                |                |                |                  |                |                |                  |      | <i>t</i>           |                     |                   |                   |                   |          |
| C29:2 <sup>a</sup>                | 2843-2873 | 0.20 ±<br>0.17 *   | <i>t</i>           | <i>t</i>           |                |                |                |                |                |                |                |                |                |                | 0.98 ±<br>0.97 * |                |                | 0.93 ±<br>0.45 * |      |                    | 34.71 ±<br>3.90 **  | 0.55 ±<br>0.22 ** |                   | 35.50 ±<br>5.28 * |          |
| MeC29:2                           | 2862      |                    |                    |                    |                |                |                |                |                |                |                |                |                |                |                  |                |                |                  |      | 0.62               |                     |                   |                   |                   |          |
| 10,14+10,12-<br>diMeC28           | 2863      |                    |                    |                    |                |                |                |                |                |                | 0.3 ±<br>0.26  | 0.34 ±<br>0.11 | 0.20 ±<br>0.13 | 0.30 ±<br>0.08 |                  |                |                |                  |      |                    |                     |                   |                   |                   |          |
| 3,7,11,15-<br>tetraMeC27          | 2865      |                    |                    |                    |                |                |                |                |                |                | 0.82 ±<br>0.08 | 0.72 ±<br>0.59 | 1.14 ±<br>0.17 | 1.02 ±<br>0.25 |                  |                |                |                  |      |                    |                     |                   |                   |                   |          |
| 8,14-diMeC28                      | 2869      |                    |                    |                    |                |                |                | 0.95 ±<br>0.17 | 0.74 ±<br>0.18 | 1.09 ±<br>0.24 |                | 0.18 ±<br>0.26 |                |                |                  |                |                |                  |      |                    |                     |                   |                   |                   |          |
| 6,10-diMeC28                      | 2876      |                    |                    |                    |                |                |                |                |                |                | 0.30 ±<br>0.05 | 0.32 ±<br>0.09 | 0.26 ±<br>0.07 | 0.34 ±<br>0.07 |                  |                |                |                  |      |                    |                     |                   |                   |                   |          |
| C29:1 (all isomers)               | 2869-2892 | 0.69 ±<br>0.51 *** | 0.59 ±<br>0.14 *** | 0.62 ±<br>0.19 *** | 0.25 ±<br>0.27 | 0.22 ±<br>0.14 | 0.85 ±<br>0.32 |                |                |                |                |                |                |                | 9.15 ±<br>3.05   | 5.68 ±<br>1.14 | 10.8 ±<br>2.73 | 5.5 ±<br>0.9     | 0.71 | 22.83 ±<br>4.08 ** | 15.12 ±<br>3.82 *** | 0.45 ±<br>0.13 *  | 26.15 ±<br>1.56** | <i>t</i> *        |          |
| (Z)-13-C29:1                      | 2870      |                    |                    |                    |                |                |                |                |                |                |                |                |                |                | 6.34             | 5.71           | 3.54           | 9.33             |      |                    |                     |                   |                   |                   |          |
| (Z)-11-C29:1                      | 2878      |                    |                    |                    |                |                |                |                |                |                |                |                |                |                | 35.95            | 22.84          | 20.16          | 46.85            |      |                    |                     |                   |                   |                   |          |
| (Z)-9-C29:1                       | 2882      |                    |                    |                    |                |                |                |                |                |                |                |                |                |                | 35.03            | 29.49          | 49.93          | 28.18            |      |                    |                     |                   |                   |                   |          |
| (Z)-7-C29:1                       | 2887      |                    |                    |                    |                |                |                |                |                |                |                |                |                |                | 13.71            | 41.96          | 19.86          | 7.86             |      |                    |                     |                   |                   |                   |          |
| (Z)-6-C29:1                       | 2891      |                    |                    |                    |                |                |                |                |                |                |                |                |                |                | 8.98             | <i>t</i>       | 6.51           | 7.79             |      |                    |                     |                   |                   |                   |          |
| 4,12-diMeC28                      | 2892      |                    |                    |                    |                |                |                |                |                |                | 0.27 ±<br>0.09 | 0.16 ±<br>0.07 | 0.21 ±<br>0.05 | 0.31 ±<br>0.08 |                  |                |                |                  |      |                    |                     |                   |                   |                   |          |
| 4,8-diMeC28                       | 2892      |                    |                    |                    |                |                |                | <i>t</i>       | <i>t</i>       | <i>t</i>       |                |                |                |                |                  |                |                |                  |      |                    |                     |                   |                   |                   |          |
| n-C29                             | 2900      | 0.19 ±<br>0.14     | 0.18 ±<br>0.06     | 0.29 ±<br>0.11     | <i>t</i>       | <i>t</i>       | <i>t</i>       | 5.02 ±<br>0.48 | 2.79 ±<br>0.87 | 5.07 ±<br>2.61 | 0.51 ±<br>0.17 | 0.40 ±<br>0.17 | 0.76 ±<br>0.24 | 1.07 ±<br>0.32 | 1.58 ±<br>1.3    | 0.97 ±<br>0.21 | 1.96 ±<br>0.95 | 0.55 ±<br>0.29   | 0.29 | 1.69 ±<br>0.35     | 1.10 ±<br>0.77      | 0.59 ±<br>0.05    | 2.29 ±<br>0.61    | <i>t</i>          | <i>t</i> |
| MeC29:1                           | 2920      |                    |                    |                    |                |                |                |                |                |                | 0.02 ±<br>0.04 | 0.51 ±<br>0.27 |                | 0.23 ±<br>0    | 1.76 ±<br>1.7    |                | 0.32 ±<br>0.2  | 1.07 ±<br>0.37   |      |                    |                     |                   |                   |                   |          |
| 11-;13-MeC29                      | 2933      |                    |                    |                    |                |                |                | 1.16 ±<br>0.25 | 0.45 ±<br>0.3  | 1.4 ±<br>0.46  |                |                |                |                |                  |                |                |                  |      |                    |                     | 0.57 ±<br>0.17    |                   |                   |          |

| Compound                | RI   | scabUK         | scabF         | scabS          | sabUK    | sabS     | sabG           | schUK          | schF           | schS           | rubUK          | rubF           | rubS           | rubG           | rugUK          | rugF           | rugS           | rugG           | van            | spe            | lob            | lobu           | wes            | sul            | alo            |          |
|-------------------------|------|----------------|---------------|----------------|----------|----------|----------------|----------------|----------------|----------------|----------------|----------------|----------------|----------------|----------------|----------------|----------------|----------------|----------------|----------------|----------------|----------------|----------------|----------------|----------------|----------|
| 9-,11-,13-MeC29         | 2933 | 0.47 ±<br>0.53 | 0.16 ±<br>0.1 | 0.27 ±<br>0.35 | <i>t</i> | <i>t</i> | 0.38 ±<br>0.12 |                |                |                | 7.12 ±<br>1.37 | 6.8 ±<br>1.57  | 6.23 ±<br>1.08 | 7.84 ±<br>0.1  | 11.47<br>±3.58 | 10.98<br>±3.25 | 10.99<br>±2.06 | 15.92<br>±1.8  |                | 3.05 ±<br>0.59 |                | 0.45 ±<br>0.13 | 0.79 ±<br>0.23 | 0.32 ±<br>0.11 | 0.21 ±<br>0.09 |          |
| 9-MeC29                 | 2938 |                |               |                |          |          |                | 0.94 ±<br>0.23 | 0.76 ±<br>0.18 | 1.15 ±<br>0.43 |                |                |                |                |                |                |                |                |                |                | 0.37 ±<br>0.15 |                |                |                |                |          |
| 7-MeC29                 | 2942 | <i>t</i>       | <i>t</i>      |                |          |          |                | 3.98 ±<br>1.15 | 4.72 ±<br>0.82 | 6.03 ±<br>1.21 | 0.38 ±<br>0.16 | 0.26 ±<br>0.14 | 0.74 ±<br>0.14 | 0.21 ±<br>0.06 | <i>t</i>       | 0.64 ±<br>0.17 | 0.91 ±<br>0.29 | 0.53 ±<br>0.07 |                | 0.28 ±<br>0.07 | 0.45 ±<br>0.3  |                | <i>t</i>       |                |                |          |
| 4,8,12,16-tetraMeC28    | 2948 |                |               |                |          |          |                |                |                |                |                |                |                |                | 0.15 ±<br>0.19 |                |                |                |                |                |                |                |                |                |                |          |
| 5-MeC29                 | 2952 | <i>t</i>       | <i>t</i>      |                | <i>t</i> |          | 0.40 ±<br>0.13 | 0.66 ±<br>0.27 | 0.32 ±<br>0.07 | 0.27 ±<br>0.22 | 1.07 ±<br>0.27 | 0.56 ±<br>0.21 | 0.5 ±<br>0.2   | 0.92 ±<br>0.15 | 0.8 ±<br>0.19  | 1.72 ±<br>0.97 | 2.24 ±<br>0.7  | 3.58 ±<br>1.27 | 1.47 ±<br>0.49 |                | 1.27 ±<br>0.21 | 1.05 ±<br>0.08 |                | 1.04 ±<br>0.27 |                |          |
| 13,17-diMeC29           | 2963 |                |               |                |          |          |                |                |                |                |                |                |                |                |                | 1.84 ±<br>2.33 | 0.34 ±<br>0.46 | 1.69 ±<br>0.58 | 7.98 ±<br>3.13 |                |                |                |                |                |                |          |
| 13,17+11,17-diMeC29     | 2960 |                |               |                |          |          |                |                |                |                | 4.39 ±<br>0.77 | 5.21 ±<br>3.33 | 2.88 ±<br>0.53 | 2.5 ±<br>0.42  |                |                |                |                |                |                |                |                |                |                |                |          |
| 11,15-diMeC29           | 2964 |                |               |                |          |          |                |                |                |                |                |                |                |                |                | 0.85 ±<br>1.9  | 1.31 ±<br>1.38 |                |                |                |                |                |                |                |                |          |
| 11,17+9,17-diMeC29      | -    |                |               |                |          |          |                |                |                |                |                | 0.57 ±<br>1.27 |                |                |                |                |                |                |                |                |                |                |                |                |                |          |
| unknown                 | 2965 |                |               |                |          |          |                |                |                |                |                |                |                |                |                |                |                |                |                |                |                |                |                |                | 1.47 ±<br>0.54 |          |
| 9,15-diMeC29            | 2966 |                |               |                |          |          |                | 2.49 ±<br>0.13 | 1.48 ±<br>0.28 | 1.85 ±<br>0.33 |                |                |                |                |                |                |                |                |                |                |                |                |                |                |                |          |
| 9,15+9,19-diMeC29       | 2968 |                |               |                |          |          |                |                |                |                |                |                |                |                |                |                | 0.60 ±<br>0.1  | <i>t</i>       |                |                |                |                |                |                |                |          |
| 9,13+9,17-diMeC29       | -    |                |               |                |          |          |                |                |                |                |                |                |                |                |                | 3.46 ±<br>0.04 |                |                |                |                |                |                |                |                |                |          |
| 9,17+9,19-diMeC29       | -    |                |               |                |          |          |                |                |                |                | <i>t</i>       | <i>t</i>       |                |                |                |                |                |                |                |                |                |                |                |                |                |          |
| 7,17-diMeC29 (+3-MeC29) | 2972 |                |               |                |          |          |                |                |                |                |                |                |                |                |                |                |                |                |                | 0.53 ±<br>0.16 |                |                |                |                |                | <i>t</i> |
| 7,11-diMeC29 (+3-MeC29) | 2973 |                |               |                |          |          |                | 5.35 ±<br>1.84 | 5.72 ±<br>1.02 | 7.05 ±<br>0.89 | 1.49 ±<br>0.36 | 2.15 ±<br>1.03 | 1.11 ±<br>0.31 | 2.64 ±<br>0.11 |                |                |                |                |                |                |                |                |                |                |                |          |
| 7,19-diMeC29 (+3-MeC29) | 2976 |                |               |                |          |          |                |                |                |                |                |                |                |                |                | 2.02 ±<br>0.28 | 1.88 ±<br>0.63 | 2.74 ±<br>0.67 | 2.72 ±<br>0.22 |                |                |                |                |                |                |          |
| 3-MeC29                 | 2975 |                | <i>t</i>      | <i>t</i>       |          |          |                |                |                |                |                |                |                |                |                |                |                |                |                |                |                | 1.40 ±<br>0.41 |                | 2.32 ±<br>0.85 |                |          |
| 5,9-diMeC29             | 2983 |                |               |                |          |          |                | 0.67 ±<br>0.18 | 0.49 ±<br>0.41 | 0.9 ±<br>0.28  |                |                |                |                |                |                |                |                |                |                |                |                |                |                |                |          |
| 5,17-diMeC29            | 2983 | 0.47 ±<br>0.6  | <i>t</i>      | 0.19 ±<br>0.15 | <i>t</i> | <i>t</i> | <i>t</i>       |                |                |                |                |                |                |                |                |                |                | 1.62 ±<br>1.2  |                | 2.25 ±<br>0.76 | 0.20 ±<br>0.14 |                | 0.73 ±<br>0.20 |                |                |          |
| 5,11+5,17-diMeC29       | 2983 |                |               |                |          |          |                |                |                |                | 2.65 ±<br>0.45 | 1.60 ±<br>0.44 | 2.43 ±<br>0.5  | 0.85 ±<br>0.03 |                |                |                |                |                |                |                |                |                |                |                |          |
| 5,15+5,17-diMeC29       | 2985 |                |               |                |          |          |                |                |                |                |                |                |                |                |                | 1.64 ±<br>0.99 | 1.23 ±<br>1.16 |                | 6.48 ±<br>2.09 |                |                |                |                |                |                |          |
| 9,13,17-triMeC29        | -    |                |               |                |          |          |                |                |                |                |                | 0.20 ±<br>0.29 |                | 0.66 ±<br>0.01 |                |                |                |                |                |                |                |                |                |                |                |          |
| 7,11,15-triMeC29        | 2995 |                |               |                |          |          |                |                |                |                |                | 0.35 ±<br>0.28 |                |                |                |                |                |                |                |                |                |                |                |                |                |          |
| 7,11,17-triMeC29        | 3000 |                |               |                |          |          |                |                |                |                | 0.33 ±<br>0.05 | 0.71 ±<br>0.85 |                | 2.03 ±<br>0.12 |                |                |                |                |                |                |                |                |                |                |                |          |

| Compound                  | RI         | scabUK         | scabF          | scabS          | sabUK    | sabS     | sabG     | schUK          | schF           | schS           | rubUK          | rubF           | rubS           | rubG           | rugUK           | rugF           | rugS            | rugG           | van    | spe                | lob                | lobu           | wes                | sul | alo |            |  |
|---------------------------|------------|----------------|----------------|----------------|----------|----------|----------|----------------|----------------|----------------|----------------|----------------|----------------|----------------|-----------------|----------------|-----------------|----------------|--------|--------------------|--------------------|----------------|--------------------|-----|-----|------------|--|
| n-C30                     | 3000       |                |                |                |          |          |          | 1.46 ±<br>0.12 | 0.9 ±<br>0.07  | 1.14 ±<br>0.54 |                |                |                |                |                 |                |                 |                |        |                    |                    |                |                    |     |     |            |  |
| 5,9,11-triMeC29           | -          |                |                |                |          |          |          |                |                |                |                | 0.11 ±<br>0.09 |                | 0.20 ±<br>0    |                 |                |                 |                |        |                    |                    |                |                    |     |     |            |  |
| 5,9,13<br>5,9,15-triMeC29 | or<br>3007 |                |                |                |          |          |          |                |                |                |                |                |                | 0.49 ±<br>0.08 |                 |                |                 |                |        |                    |                    |                |                    |     |     |            |  |
| 3,15-diMeC29              | 3008       |                |                |                |          |          |          |                |                |                | 0.74 ±<br>0.18 | <i>t</i>       |                |                | 0.74 ±<br>0.29  | 0.61 ±<br>0.23 | 1.16 ±<br>1.09  | 1.08 ±<br>0.41 |        |                    |                    |                |                    |     |     |            |  |
| 3,7-diMeC29               | 3009       |                |                |                |          |          |          | 1.55 ±<br>0.23 | 2.17 ±<br>0.23 | 3.7 ±<br>0.68  |                |                |                |                |                 |                |                 |                |        | <i>t</i>           |                    |                | 0.34 ±<br>0.43     |     |     |            |  |
| 12-,13-,14-MeC30          | 3032       |                |                |                |          |          |          | 0.71 ±<br>0.04 | 0.38 ±<br>0.08 | 0.74 ±<br>0.17 | 0.45 ±<br>0.03 | 0.21 ±<br>0.06 | 0.20 ±<br>0.03 | 0.16 ±<br>0.02 | 0.75 ±<br>0.15  | 1.05 ±<br>0.2  | 1.22 ±<br>0.3   | 0.77 ±<br>0.06 |        |                    |                    |                |                    |     |     |            |  |
| 3,7,11-triMeC29           | 3039       |                |                |                |          |          |          |                |                |                | 0.31 ±<br>0.04 | 0.27 ±<br>0.19 | 0.53 ±<br>0.44 | 0.36 ±<br>0.02 |                 |                |                 |                |        |                    |                    |                |                    |     |     |            |  |
| 8-MeC30                   | 3040       |                |                |                |          |          |          | 3.31 ±<br>0.34 | 4.13 ±<br>0.39 | 4.72 ±<br>0.4  |                |                |                |                |                 |                |                 |                |        |                    |                    |                |                    |     |     |            |  |
| MeC31:2                   | 3048       | 0.85 ±<br>0.74 | <i>t</i>       |                |          |          |          |                |                |                |                |                |                |                |                 |                |                 |                |        |                    |                    |                |                    |     |     |            |  |
| MeC31:2                   | 3056       |                |                |                |          |          |          |                |                |                |                |                |                |                |                 |                |                 |                |        | 0.94               |                    |                |                    |     |     |            |  |
| 13,17-diMeC30             | 3060       |                |                |                |          |          |          |                |                | 0.32 ±<br>0.62 |                | 0.18 ±<br>0.09 |                | <i>t</i>       |                 |                |                 |                |        |                    |                    |                |                    |     |     |            |  |
| 3,7,11,17-<br>tetraMeC29  | 3062       |                |                |                |          |          |          |                |                |                | 0.49 ±<br>0.05 | 0.17 ±<br>0.14 | 0.33 ±<br>0.14 | 0.30 ±<br>0.01 |                 |                |                 |                |        |                    |                    |                |                    |     |     |            |  |
| 8,14-diMeC30              | 3068       |                |                |                |          |          |          | 2.8 ±<br>0.16  | 2.78 ±<br>0.3  | 2.37 ±<br>0.58 |                |                |                |                |                 |                |                 |                |        |                    |                    |                |                    |     |     |            |  |
| C31:2 <sup>a</sup>        | 3047-3080  |                |                |                |          |          |          |                |                |                |                |                |                |                | 21.23<br>± 4.63 | 1.71 ±<br>0.64 | 18.59<br>± 3.93 | 6.73 ±<br>1.84 |        | 0.85 ±<br>0.19 *** | 60.11 ±<br>1.57 ** |                | 18.12 ±<br>3.54 ** |     |     | <i>t</i> * |  |
| 6,10-diMeC30              | 3075       |                |                |                |          |          |          | 0.54 ±<br>0.09 | 0.56 ±<br>0.08 | 0.74 ±<br>0.09 |                |                |                |                |                 |                |                 |                |        |                    |                    |                |                    |     |     |            |  |
| C31:1 (all isomers)       | 3070-3090  | 0.43 ±<br>0.32 | 0.30 ±<br>0.17 | 0.23 ±<br>0.13 | <i>t</i> | <i>t</i> | <i>t</i> |                |                |                |                |                |                |                | 1.71 ±<br>1.79  | 8.32 ±<br>2.35 | 2.9 ±<br>1.73   | 3.02 ±<br>1.13 | 0.48 * | 0.23 ±<br>0.09 *   | 12.04 ±<br>2.49 *  |                | 4.90 ±<br>0.85 **  |     |     |            |  |
| (Z)-13-C31:1              | 3070       |                |                |                |          |          |          |                |                |                |                |                |                |                | 12.18           | 8.95           | 5.25            | 13.53          |        |                    |                    |                |                    |     |     |            |  |
| (Z)-11-C31:1              | 3077       |                |                |                |          |          |          |                |                |                |                |                |                |                | 55.65           | 54.58          | 51.21           | 63.94          |        |                    |                    |                |                    |     |     |            |  |
| (Z)-9-C31:1               | 3082       |                |                |                |          |          |          |                |                |                |                |                |                |                | 32.17           | 21.95          | 38.87           | 22.53          |        |                    |                    |                |                    |     |     |            |  |
| (Z)-7-C31:1               | 3088       |                |                |                |          |          |          |                |                |                |                |                |                |                | <i>t</i>        | 14.52          | 4.67            | <i>t</i>       |        |                    |                    |                |                    |     |     |            |  |
| 4,8-diMeC30               | 3091       |                |                |                |          |          |          | <i>t</i>       | <i>t</i>       | <i>t</i>       |                |                |                |                |                 |                |                 |                |        |                    |                    |                |                    |     |     |            |  |
| n-C31                     | 3100       | <i>t</i>       | <i>t</i>       | <i>t</i>       |          |          |          | 4.44 ±<br>1.28 | 1.9 ±<br>0.46  | 2.9 ±<br>1.4   |                |                |                |                |                 |                |                 |                |        | <i>t</i>           |                    |                |                    |     |     | <i>t</i>   |  |
| MeC31:1                   | -          |                |                |                |          |          |          |                |                |                | <i>t</i>       | 0.21 ±<br>0.17 |                | <i>t</i>       | 0.53 ±<br>0.52  |                | 0.54 ±<br>0.34  | 0.58 ±<br>0.28 |        |                    |                    |                |                    |     |     |            |  |
| MeC31:1                   | -          |                |                |                |          |          |          |                |                |                |                |                |                |                | 2.71 ±<br>1.3   |                | 2.13 ±<br>0.8   | 1.1 ±<br>0.49  |        |                    |                    |                |                    |     |     |            |  |
| 11-,13-,15-MeC31          | 3134       |                |                |                |          |          |          | 7.49 ±<br>0.99 | 5.21 ±<br>0.57 | 6.44 ±<br>1.49 | 1.84 ±<br>0.9  | 0.64 ±<br>0.17 | 0.52 ±<br>0.15 | 0.59 ±<br>0.09 | 5.81 ±<br>1.27  | 9.96 ±<br>2.63 | 5.99 ±<br>1.46  | 3.61 ±<br>0.95 |        | 0.42 ±<br>0.35     | 0.61 ±<br>0.12     | 0.24 ±<br>0.15 | 0.27 ±<br>0.05     |     |     | <i>t</i>   |  |
| 9-MeC31                   | 3139       |                |                |                |          |          |          | 3.84 ±<br>0.51 | 4.37 ±<br>0.57 | 3.44 ±<br>0.65 |                |                |                |                |                 |                |                 |                |        |                    |                    |                |                    |     |     |            |  |

| Compound                                        | RI   | scabUK   | scabF | scabS | sabUK    | sabS     | sabG     | schUK          | schF             | schS           | rubUK          | rubF           | rubS           | rubG           | rugUK          | rugF           | rugS           | rugG           | van | spe      | lob            | lobu | wes | sul            | alo |  |
|-------------------------------------------------|------|----------|-------|-------|----------|----------|----------|----------------|------------------|----------------|----------------|----------------|----------------|----------------|----------------|----------------|----------------|----------------|-----|----------|----------------|------|-----|----------------|-----|--|
| 7-MeC31                                         | 3145 |          |       |       |          |          |          | 3.79 ±<br>0.62 | 4.23 ±<br>0.57   | 4.5 ±<br>0.77  |                |                |                |                |                |                |                |                |     |          |                |      |     |                |     |  |
| 4,8,12,16-tetraMeC30                            | -    |          |       |       |          |          |          |                |                  |                | 0.22 ±<br>0.08 | <i>t</i>       | 0.16 ±<br>0.07 |                |                |                |                |                |     |          |                |      |     |                |     |  |
| 5-MeC31                                         | -    |          |       |       |          |          |          |                |                  |                |                |                |                |                | 0.88 ±<br>0.25 | 0.64 ±<br>0.27 | 1.02 ±<br>1.0  |                |     |          |                |      |     |                |     |  |
| 13,17-diMeC31                                   | 3161 |          |       |       |          |          |          | 1.12 ±<br>0.2  | 0.81 ±<br>0.12   | 2.65 ±<br>1.8  | 2.52 ±<br>0.11 | 1.68 ±<br>2.06 | 0.93 ±<br>0.32 | 0.91 ±<br>0.04 | 5.9 ±<br>3.52  | 9.01 ±<br>3.99 | 9.88 ±<br>3.64 | 8.67 ±<br>0.91 |     | <i>t</i> |                |      |     |                |     |  |
| 11,19-diMeC31                                   | -    |          |       |       |          |          |          |                |                  |                |                | 0.31 ±<br>0.22 | <i>t</i>       | 0.39 ±<br>0.02 |                |                |                |                |     |          |                |      |     | 0.28 ±<br>0.17 |     |  |
| 11,15-diMeC31                                   | -    |          |       |       |          |          |          |                |                  |                |                |                |                |                |                |                |                |                |     |          |                |      |     |                |     |  |
| 9,15-diMeC31                                    | 3169 |          |       |       |          |          |          | 4.89 ±<br>0.55 | 3.01 ±<br>0.64   | 2.65 ±<br>0.45 |                |                |                |                |                |                |                |                |     |          |                |      |     |                |     |  |
| 9,x-diMeC31 (mixture of 9,13; 9,17; 9,19; 9,21) | -    |          |       |       |          |          |          |                |                  |                |                |                |                |                | 1.89 ±<br>0.86 | 1.74 ±<br>0.51 | 1.45 ±<br>0.7  | 1.14 ±<br>0.2  |     |          |                |      |     |                |     |  |
| 9,x-diMeC31+3-MeC31                             | -    |          |       |       |          |          |          |                |                  |                |                | <i>t</i>       | <i>t</i>       | 0.30 ±<br>0.06 |                |                |                |                |     |          |                |      |     |                |     |  |
| MeC33:2                                         | 3175 | <i>t</i> |       |       |          |          |          |                |                  |                |                |                |                |                |                |                |                |                |     |          |                |      |     |                |     |  |
| 7,19-diMeC31 +3-MeC31                           | -    |          |       |       |          |          |          |                |                  |                | 0.21 ±<br>0.03 | <i>t</i>       | 0.27 ±<br>0.07 |                |                |                |                |                |     |          |                |      |     |                |     |  |
| 7,11+7,17+7,19-diMeC31+(3-MeC31)                | 3178 |          |       |       |          |          |          | 16.0 ±<br>1.17 | 21.85 ±<br>± 2.1 | 15.3 ±<br>1.21 |                |                |                |                |                |                |                |                |     |          |                |      |     |                |     |  |
| 7,x-diMeC31 +3-MeC31                            | -    |          |       |       |          |          |          |                |                  |                |                |                |                |                |                | 1.17 ±<br>0.51 | 0.44 ±<br>0.58 | 0.6 ±<br>0.13  |     |          |                |      |     |                |     |  |
| 5,17-diMeC31                                    | 3184 | <i>t</i> |       |       | <i>t</i> | <i>t</i> | <i>t</i> | 1.52 ±<br>0.36 | 0.96 ±<br>0.33   | 1.35 ±<br>0.76 | 4.08 ±<br>2.62 | 0.16 ±<br>0.08 | 0.20 ±<br>0.12 | <i>t</i>       | 2.38 ±<br>1.43 | 2.45 ±<br>2.45 | 1.70 ±<br>1.71 | 5.02 ±<br>0.51 |     |          |                |      |     |                |     |  |
| 5,15-diMeC31                                    | -    |          |       |       |          |          |          |                |                  |                |                |                |                |                |                |                |                |                |     |          | 0.35 ±<br>0.42 |      |     |                |     |  |
| 9,13,17-triMeC31                                | -    |          |       |       |          |          |          |                |                  |                |                | <i>t</i>       | <i>t</i>       | <i>t</i>       |                |                |                |                |     |          |                |      |     |                |     |  |
| 7,11,13 or 7,11,17-triMeC31                     | 3201 |          |       |       |          |          |          | 1.92 ±<br>0.16 | 2.32 ±<br>0.27   | 1.75 ±<br>0.24 |                |                |                |                |                |                |                |                |     |          |                |      |     |                |     |  |
| 7,11,x-triMeC31                                 | -    |          |       |       |          |          |          |                |                  |                | 1.47 ±<br>1.27 | 0.03 ±<br>0.05 |                |                |                |                |                |                |     |          |                |      |     |                |     |  |
| 3,15-diMeC31                                    | -    |          |       |       |          |          |          |                |                  |                |                | <i>t</i>       |                | 0.39 ±<br>0.01 | 0.77 ±<br>0.33 | 0.95 ±<br>0.24 | 0.78 ±<br>0.82 | 0.79 ±<br>0.07 |     |          |                |      |     |                |     |  |
| 3,7-diMeC31                                     | 3214 |          |       |       |          |          |          | 0.85 ±<br>0.23 | 1.15 ±<br>0.25   | 1.36 ±<br>0.22 |                |                |                |                |                |                |                |                |     |          |                |      |     |                |     |  |
| unknown                                         | 3218 |          |       |       |          |          |          | 1.1 ±<br>0.2   | 1.63 ±<br>0.34   | 0.75 ±<br>0.1  |                |                |                |                |                |                |                |                |     |          |                |      |     |                |     |  |
| 14-,15-,16-MeC32                                | 3233 |          |       |       |          |          |          | 1.13 ±<br>0.11 | 1.08 ±<br>0.08   | 0.95 ±<br>0.12 |                |                |                |                |                |                |                |                |     |          |                |      |     |                |     |  |
| 14-MeC32                                        | -    |          |       |       |          |          |          |                |                  |                |                |                |                |                | <i>t</i>       | 0.28 ±<br>0.27 | <i>t</i>       |                |     |          |                |      |     |                |     |  |
| 12-,14-MeC32                                    | -    |          |       |       |          |          |          |                |                  |                | 0.34 ±<br>0.23 |                |                |                |                |                |                |                |     |          |                |      |     |                |     |  |
| 3,7,15-triMeC31                                 | -    |          |       |       |          |          |          |                |                  |                | 0.48 ±<br>0.21 |                |                |                |                |                |                |                |     |          |                |      |     |                |     |  |
| 3,7,13-triMeC31 (+8-MeC32)                      | 3242 |          |       |       |          |          |          | 2.14 ±<br>0.14 | 3.29 ±<br>0.46   | 2.65 ±<br>0.31 |                |                |                |                |                |                |                |                |     |          |                |      |     |                |     |  |



| Compound                 | RI   | scabUK | scabF | scabS | sabUK | sabS | sabG | schUK       | schF        | schS        | rubUK       | rubF | rubS | rubG | rugUK       | rugF         | rugS        | rugG        | van | spe      | lob             | lobu | wes | sul | alo |  |
|--------------------------|------|--------|-------|-------|-------|------|------|-------------|-------------|-------------|-------------|------|------|------|-------------|--------------|-------------|-------------|-----|----------|-----------------|------|-----|-----|-----|--|
| C33:2                    | -    |        |       |       |       |      |      |             |             |             |             |      |      |      | 5.7 ± 0.36  | 11.87 ± 4.63 | 4.31 ± 1.51 | 2.33 ± 0.89 |     |          | 1.58 ± 0.46 *** |      |     |     |     |  |
| 4,18-diMeC32             | 3262 |        |       |       |       |      |      | <i>t</i>    | 0.21 ± 0.1  | 0.28 ± 0.31 |             |      |      |      |             |              |             |             |     |          |                 |      |     |     |     |  |
| 8,14-diMeC32             | 3270 |        |       |       |       |      |      | 3.63 ± 0.3  | 4.51 ± 0.6  | 2.96 ± 0.5  |             |      |      |      |             |              |             |             |     |          |                 |      |     |     |     |  |
| 6,14-diMeC32             | -    |        |       |       |       |      |      |             |             |             | 0.21 ± 0.14 |      |      |      |             |              |             |             |     |          |                 |      |     |     |     |  |
| C33:1 <sup>a</sup>       | -    |        |       |       |       |      |      |             |             |             |             |      |      |      | 0.88 ± 0.42 | 1.37 ± 0.15  | 0.85 ± 0.22 | 0.29 ± 0.12 |     |          | <i>t</i>        |      |     |     |     |  |
| 4,14+4,16-diMeC32        | -    |        |       |       |       |      |      |             |             |             | 0.40 ± 0.45 |      |      |      |             |              |             |             |     |          |                 |      |     |     |     |  |
| C33                      | 3300 |        |       |       |       |      |      | 0.38 ± 0.12 | 0.22 ± 0.06 |             |             |      |      |      |             |              |             |             |     |          |                 |      |     |     |     |  |
| MeC33:1                  | -    |        |       |       |       |      |      |             |             |             |             |      |      |      | 0.57 ± 0.27 | 0.60 ± 0.65  | 0.28 ± 0.13 | 0.39 ± 0.29 |     |          |                 |      |     |     |     |  |
| MeC33:1                  | -    |        |       |       |       |      |      |             |             |             |             |      |      |      | 0.30 ± 0.2  | 0.19 ± 0.2   | 0.20 ± 0.09 |             |     | <i>t</i> |                 |      |     |     |     |  |
| 13-,15-,17-MeC33         | -    |        |       |       |       |      |      | 2.31 ± 0.47 | 2.23 ± 0.26 | 1.8 ± 0.21  |             |      |      |      |             |              |             |             |     |          |                 |      |     |     |     |  |
| 9-,11-,13-MeC33          | -    |        |       |       |       |      |      |             |             |             |             |      |      |      | 0.68 ± 0.23 | 1.26 ± 0.39  | 0.53 ± 0.29 | 0.66 ± 0.18 |     |          |                 |      |     |     |     |  |
| 11-MeC33                 | -    |        |       |       |       |      |      |             |             |             | 0.86 ± 0.94 |      |      |      |             |              |             |             |     |          |                 |      |     |     |     |  |
| 9-MeC33                  | -    |        |       |       |       |      |      | 1.19 ± 0.18 | 1.33 ± 0.15 | 1.07 ± 0.26 |             |      |      |      |             |              |             |             |     |          |                 |      |     |     |     |  |
| 13,17-diMeC33            | -    |        |       |       |       |      |      | 0.56 ± 0.09 | 0.40 ± 0.05 | 0.80 ± 0.6  |             |      |      |      | 0.68 ± 0.22 | 1.05 ± 0.2   | 1.08 ± 1.1  | 0.79 ± 0.11 |     |          |                 |      |     |     |     |  |
| 11,21-diMeC33            | -    |        |       |       |       |      |      |             |             |             |             |      |      |      | 0.69 ± 0.27 | 1.05 ± 0.2   | 0.52 ± 0.67 | 0.55 ± 0.15 |     |          |                 |      |     |     |     |  |
| 9,19+9,21-diMeC33        | -    |        |       |       |       |      |      | 4.13 ± 0.44 | 3.83 ± 0.25 | 2.07 ± 0.2  |             |      |      |      |             |              |             |             |     |          |                 |      |     |     |     |  |
| 7,19-diMeC33             | -    |        |       |       |       |      |      | 1.7 ± 0.23  | 2.86 ± 0.45 | 1.45 ± 0.36 |             |      |      |      |             |              |             |             |     |          |                 |      |     |     |     |  |
| 5,15-diMeC33             | -    |        |       |       |       |      |      |             |             |             |             |      |      |      |             |              |             |             |     |          | <i>t</i>        |      |     |     |     |  |
| 5,17-diMeC33             | -    |        |       |       |       |      |      |             |             |             |             |      |      |      | 0.69 ± 0.46 | 1.05 ± 0.59  | 0.44 ± 0.48 | 1.15 ± 0.28 |     |          |                 |      |     |     |     |  |
| 5,19-diMeC33             | -    |        |       |       |       |      |      |             |             |             | 1.98 ± 2.39 |      |      |      |             |              |             |             |     |          |                 |      |     |     |     |  |
| 7,13,19-triMeC33         | -    |        |       |       |       |      |      | 0.52 ± 0.02 | 0.67 ± 0.16 | <i>t</i>    |             |      |      |      |             |              |             |             |     |          |                 |      |     |     |     |  |
| unknown                  | -    |        |       |       |       |      |      | 0.37 ± 0.14 | 0.58 ± 0.22 |             |             |      |      |      |             |              |             |             |     |          |                 |      |     |     |     |  |
| 14-,15-,16-MeC34         | -    |        |       |       |       |      |      | 0.20 ± 0.57 | <i>t</i>    |             |             |      |      |      |             |              |             |             |     |          |                 |      |     |     |     |  |
| 3,7,13-triMeC33          | -    |        |       |       |       |      |      | <i>t</i>    | <i>t</i>    |             |             |      |      |      |             |              |             |             |     |          |                 |      |     |     |     |  |
| 3,x,y-triMe+3,15-diMeC33 | -    |        |       |       |       |      |      |             |             |             | 0.37 ± 0.45 |      |      |      |             |              |             |             |     |          |                 |      |     |     |     |  |
| 8,14-diMeC34             | -    |        |       |       |       |      |      | 0.53 ± 0.13 | 0.54 ± 0.12 |             |             |      |      |      |             |              |             |             |     |          |                 |      |     |     |     |  |

| Compound           | RI | scabUK | scabF | scabS | sabUK | sabS | sabG | schUK          | schF           | schS | rubUK | rubF | rubS | rubG | rugUK          | rugF           | rugS           | rugG           | van      | spe | lob      | lobu | wes | sul | alo |  |
|--------------------|----|--------|-------|-------|-------|------|------|----------------|----------------|------|-------|------|------|------|----------------|----------------|----------------|----------------|----------|-----|----------|------|-----|-----|-----|--|
| C35:2 <sup>a</sup> | -  |        |       |       |       |      |      |                |                |      |       |      |      |      | 1.2 ±<br>0.31  | 6.97 ±<br>1.87 | 0.35 ±<br>0.27 | 0.5 ±<br>0.25  |          |     | <i>t</i> |      |     |     |     |  |
| C35:1              | -  |        |       |       |       |      |      |                |                |      |       |      |      |      |                | 0.90 ±<br>0.2  |                |                | <i>t</i> |     |          |      |     |     |     |  |
| 13-;15-;17-MeC35   | -  |        |       |       |       |      |      | 0.38 ±<br>0.03 | 0.40 ±<br>0.09 |      |       |      |      |      |                |                |                |                |          |     |          |      |     |     |     |  |
| 11-;13-;15-MeC35   | -  |        |       |       |       |      |      |                |                |      |       |      |      |      |                | 0.34 ±<br>0.07 |                |                | <i>t</i> |     |          |      |     |     |     |  |
| 13,17+11,x-diMeC35 | -  |        |       |       |       |      |      |                |                |      |       |      |      |      | 0.33 ±<br>0.19 | 1.03 ±<br>0.15 | 0.19 ±<br>0.16 | 0.61 ±<br>0.08 |          |     |          |      |     |     |     |  |
| 9,21-diMeC35       | -  |        |       |       |       |      |      | 1.22 ±<br>0.33 | 0.85 ±<br>0.11 |      |       |      |      |      |                |                |                |                |          |     |          |      |     |     |     |  |
| unknown            | -  |        |       |       |       |      |      | 0.55 ±<br>0.18 | 0.43 ±<br>0.18 |      |       |      |      |      |                |                |                |                |          |     |          |      |     |     |     |  |
| 5,17-diMeC35       | -  |        |       |       |       |      |      |                |                |      |       |      |      |      | <i>t</i>       | 0.44 ±<br>0.15 |                | 0.24 ±<br>0.06 |          |     |          |      |     |     |     |  |
| C37:2 <sup>a</sup> | -  |        |       |       |       |      |      |                |                |      |       |      |      |      | 0.28 ±<br>0.17 | 2.62 ±<br>0.82 |                |                |          |     |          |      |     |     |     |  |
| C37:1              | -  |        |       |       |       |      |      |                |                |      |       |      |      |      |                | 0.33 ±<br>0.20 |                |                |          |     |          |      |     |     |     |  |
| 13,17+11,x-diMeC37 | -  |        |       |       |       |      |      |                |                |      |       |      |      |      | 0.20 ±<br>0.16 | 0.52 ±<br>0.12 |                | 0.22 ±<br>0.16 |          |     |          |      |     |     |     |  |
| C39:2 <sup>a</sup> | -  |        |       |       |       |      |      |                |                |      |       |      |      |      | 0.47 ±<br>0.33 | 0.41 ±<br>0.38 |                |                |          |     |          |      |     |     |     |  |

van Den Dool H, Kratz PD (1963) A generalization of the retention index system including linear temperature programmed gas-liquid partition chromatography. J Chromatogr A 11:463-471
